# Supplementary material for: Palaeoecology of ungulates in northern Iberia during the Late Pleistocene through isotopic analysis of teeth
Source: Copernicus journal article supplement (doi:10.5194/bg-21-4413-2024), 2024-10-10
Supplement: Supplementary file 1 [file bg-21-4413-2024-supplement.pdf]

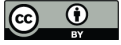

*Supplement of*

## **Palaeoecology of ungulates in northern Iberia during the Late Pleistocene through isotopic analysis of teeth**

**Mónica Fernández-García et al.**

*Correspondence to:* Mónica Fernández-García ([monica.fegar@gmail.com](mailto:monica.fegar@gmail.com)) and Ana B. Marín-Arroyo ([anabelen.marin@unican.es](mailto:anabelen.marin@unican.es))

The copyright of individual parts of the supplement might differ from the article licence.

## 1 Section S1. Sites description

2

### 3 S1.1. Vasco-Cantabrian sites

#### 4 Axlor (Dima, Vizcaya, País Vasco)

5 Axlor is a rock-shelter located in Dima (43.2706; -1.8905), with a continuous Middle Paleolithic sequence  
6 from the MIS5 to the MIS3 (DeMuro et al., 2023; Pederzani et al., 2023; Marín-Arroyo et al., 2018). It is  
7 placed on the southwestern slope of the Dima Valley, with an elevation of approximately 320 m above sea  
8 level (a.s.l.), at 33 km straight from the present-day coastline, next to one of the lowest mountain passes  
9 linking the Cantabrian basins and the Alavese Plateau. The site was discovered in 1932 and initial  
10 excavations were performed by Barandiarán (1967-1974). J. M. Barandiarán undertook the excavations  
11 between 1967 and 1974, identifying eight Mousterian levels (I-VIII) (Barandiarán, 1980).

12 From 2000 to 2008, new excavations by González-Urquijo, Ibáñez-Estévez and Rios-Garaizar were  
13 achieved and, since 2019, these are ongoing by González-Urquijo and Lazuén. Due to the lack of  
14 chronology during Barandiarán excavations, among other aspects, work was focused on obtaining a detailed  
15 stratigraphy on the new excavation areas to correlate it with Barandiarán's levels (González-Urquijo &  
16 Ibáñez-Estévez, 2021; González Urquijo et al., 2005). The new stratigraphic sequence is roughly equivalent  
17 to the previous one, but with additional levels not previously identified or excavated by Barandiarán. Some  
18 of these levels were deposited before Level VIII (Gómez-Olivencia et al., 2018; 2020). The Middle  
19 Paleolithic sequence extends from layers VIII to III (or from N to B-C). Levallois production is predominant  
20 in the lower levels (VI to VIII), while Quina Mousterian technocomplex does in the upper ones (from III  
21 to V) (Rios-Garaizar, 2012, 2017). Recent chronological data by radiocarbon (Pederzani et al., 2023; Marín-  
22 Arroyo et al., 2018) and OSL (Demuro et al., 2023) methods confirm that a sequence Axlor levels VI, VIII,  
23 and VIII probably accumulated during MIS5d-a (109–82 ka), while levels D to B probably were formed  
24 during the period encompassing the start of MIS 4 (71–57 ka) through to the beginning or middle of MIS  
25 3 (57–29 ka) and upper Level III to 46,200 ±3,000 BP, which calibrates between 45,350 cal BP and beyond  
26 the calibration curve at > 55,000 cal BP.

27 The archaeozoological study indicates an anthropic origin of the faunal assemblage with scarce carnivore  
28 activity documented (Altuna, 1989; Castaños, 2005; Gómez-Olivencia et al., 2018). In lower layers, the  
29 most abundant taxa are *Cervus elaphus* (VIII) and *Capra pyrenaica* (VII), while in upper layers III-V,  
30 *Cervus elaphus* is substituted by *Bos primigenius/Bison priscus* and *Equus sp.* The material included in  
31 this work comes from the faunal collection of the Barandiarán excavation currently curated at the Bizkaia  
32 Museum of Archaeology (Bilbao), where teeth were sampled, and the stable isotope analyses on enamel  
33 phosphate were included in Pederzani et al. (2023).

34

#### 35 El Castillo (Puente Viesgo, Cantabria)

36 El Castillo cave is located in Puente Viesgo (43.2924; -3.9656), with an elevation of approximately 195m  
37 a.s.l., at 17 km straight from the present-day coastline. The cave belongs to the karstic system that was  
38 formed in the Monte Castillo, which dominates the Pas Valley. The site was discovered in 1903 by H.  
39 Alcalde del Río. H. Obermaier carried out the first excavation seasons between 1910 and 1914 when many  
40 of the archaeological remains were recovered, mainly from the cave hall. These interventions were done  
41 under the supervision of the “Institut de Paléontologie Humaine” (IPH) and Prince Albert I of Monaco.  
42 From 1980 to 2011, V. Cabrera and F. Bernaldo de Quirós underwent new excavations focusing on the  
43 cave entrance, on the Middle to Upper Paleolithic transitional levels, mainly 16, 18 and 20 (Cabrera-Valdes,  
44 1984). The site has yielded an important stratigraphic sequence, composed by 26 sedimentological units  
45 (1-26) related to different anthropic occupational units, often separated by archaeologically sterile units:  
46 Eneolithic (2), Azilian (4), Magdalenian (6 and 8), Solutrean (10), Aurignacian (12, 14, 16 and 18),  
47 Mousterian (20, 21 and 22) and Acheulean (24) (Cabrera-Valdés, 1984).

48 Unit 21 is mostly sterile (Cabrera Valdés, 1984; Martín-Perea et al., 2023), and ESR dated it, yielding a  
49 mean date of  $69,000 \pm 9,200$  years BP (Rink et al., 1997). However, Martín-Perea et al. (2023) suggested  
50 some dating uncertainty from interpreting the initial stratigraphic nomenclature. They suggest that the ESR  
51 dates provided for level 21 by Rink et al. (1997) were erroneously attributed to this unit and it might  
52 correspond to 20E, indicating that below that subunit, the chronology is older than 70,000 years BP (Martín-  
53 Perea et al., 2023). The Mousterian Unit 20 cave is divided into several subunits (Martín-Perea et al., 2023).  
54 In Unit 20, a cave roof collapse took place, transforming the cave system into an open rock shelter. This  
55 unit contains abundant archaeological and paleontological remains. Lithic industry consists of sidescrapers,  
56 denticulates, notches and cleavers, the majority on quartzite and presents both unifacial, bifacial discoid  
57 debitage and Levallois debitage. Unit 20E was attributed to Quina Mousterian by Sánchez-Fernández and  
58 Bernaldo De Quiros (2009) and contains a Neanderthal tooth (Garralda, 2005). Considering the  
59 geochronological uncertainties for dates on 20E related to Rink et al. (1997), we have decided to rely solely  
60 on ESR date of  $47,000 \pm 9400$  BP provided by Liberda et al. (2010) for this level. Unit 20C presents clear  
61 evidence of the Mousterian lithic industry and radiocarbon dates of  $48,700 \pm 3,400$  uncal BP (OxA-22204)  
62 and  $49,400 \pm 3,700$  uncal BP (OxA-22205) (Wood et al., 2018) and mean ESR date of  $42,700 \pm 9900$  BP  
63 (Liberda et al., 2010). Level 19 is archaeologically sterile and separates Unit 20 from Unit 18 (Wood et al.,  
64 2018).

65 Unit 18 is divided into 18A (archaeologically sterile), 18B, and 18C. Levels 18B and 18C were classified  
66 as Transitional Aurignacian, representing a gradual transformation from the Mousterian to the Aurignacian,  
67 which is unique to El Castillo cave (Cabrera et al., 2001; Maíllo and Bernaldo de Quirós, 2010; Wood et  
68 al., 2018). These levels' dates and cultural attribution have been the subject of much debate (e.g. Zilhao  
69 and D'Errico, 2003; Wood et al., 2018). According to Wood et al. (2018), the last dates of these levels  
70 range between  $42,000 \pm 1,500$  uncal BP (OxA-22203) and  $46,000 \pm 2,400$  uncal BP (OxA-21973), which is  
71 much earlier than the start of the Aurignacian period in the Cantabrian region (Marín-Arroyo et al., 2018;  
72 Vidal-Cordasco et al., 2022). The lithic assemblage of Unit 18 appears to be dominated by  
73 Discoid/Levallois technology (Bernaldo de Quirós and Maíllo-Fernández, 2009) but with a high percentage  
74 of "Upper Paleolithic" pieces. Additionally, punctual bone industry and pieces with incisions and  
75 engravings were discovered in Unit 18 (Cabrera-Valdés et al., 2001). Three deciduous tooth crowns  
76 attributed to Neanderthals were found in Unit 18B (Garralda et al., 2022). Above, Unit 17 is sterile but  
77 contains scarce lithic and faunal materials, while Level 16 was attributed to the Proto-Aurignacian, with  
78 dates of  $38,600 \pm 1,000$  uncal BP (OxA-22200) (Wood et al., 2018).

79 According to Luret et al. (2020), there was a shift in hunting practices between the Late Mousterian (unit  
80 20) and the Transitional Aurignacian (unit 18). During the Late Mousterian, hunting strategies were less  
81 specialized, and the species hunted included red deer, horses, and bovines. However, in Unit 18, a  
82 specialization in red deer hunting is observed. However, the explanation of this shift has been proposed as  
83 a response to a cultural choice or induced by climatic changes. However, recent taphonomic studies by  
84 Sanz-Royo et al. (2023) on the old collections of Aurignacian Delta level reveal a more significant role of  
85 carnivores than shown by Luret et al. (2020). The material included in this work comes from the faunal  
86 collection recovered during the Cabrera-Valdés and Bernaldo de Quirós excavations curated at Museo de  
87 Prehistoria y Arqueología de Cantabria (MUPAC, Santander).

88

### 89 **Labeko Koba (Arrastre, Guipúzcoa, País Vasco)**

90 Labeko Koba is a cave in the Kurtzetxiki Hill (43.0619; -2.4833), at 246 m a.s.l. and 29 km straight from  
91 the present-day Atlantic coast. In 1987 and 1988, the site was discovered due to the construction of the  
92 Arrasate ring road, and a savage excavation was carried out (Arrizabalaga, 2000a). Unfortunately, the site  
93 was destroyed after that. The stratigraphic sequence identified nine different levels. The lower Level IX  
94 was attributed to the Châtelperronian, based on the presence of three Châtelperron points. Although there  
95 is a lack of human remains in few Cantabrian Châtelperronian sites, recent research has suggested that this  
96 techno-complex was produced by Neanderthals (Maroto et al., 2012; Rios-Garaizar et al., 2022). Level VII  
97 marks the beginning of the Aurignacian sequence, likely Proto-Aurignacian, with a lithic assemblage

98 dominated by Dufour bladelets (Arrizabalaga, 2000a). Levels VI, V, and IV contain lithic assemblages that  
99 suggested an Early Aurignacian attribution (Arrizabalaga, 2000b; Arrizabalaga et al., 2009). This site is  
100 significant because it is one of the few sites with Châtelperronian assemblages and with both Proto-  
101 Aurignacian and Early Aurignacian separated (Arrizabalaga et al., 2009).

102 Initial radiocarbon dates were inconsistent with the stratigraphy of the site and much more recent than  
103 expected for the Early Upper Paleolithic (Arrizabalaga, 2000a). This incoherence was determined to be  
104 affected by taphonomic alterations (Wood et al., 2014). Later radiocarbon dates undertaken with an  
105 ultrafiltration pre-treatment provided a new regional framework for the regional Early Upper Paleolithic  
106 (Wood et al., 2014). The Châtelperronian layer IX inf is dated to 38,100±900 uncal BP (OxA-22562) and  
107 37,400±800 uncal BP (OxA-22560). The Proto-Aurignacian levels cover a period from 36,850±800 uncal  
108 BP (OxA-21766) to 35,250±650 uncal BP (OxA-21793). The three Early Aurignacian levels are dated to  
109 35,100±600 uncal BP (OxA-21778) for level VI, ~ 34,000 uncal BP (OxA-21767 and OxA-21779) for level  
110 V, and ~ 33,000 BP (OxA-21768 and OxA-21780) for level IV (Arrizabalaga et al., 2009).

111 Taphonomic studies indicate an alternation in the use of the cave between carnivores and humans, the latter  
112 during short occupation periods (Villaluenda et al., 2012; Ríos-Garaizar et al., 2012; Arrizabalaga et al.,  
113 2010). Labeko Koba is considered to have functioned as a natural trap where carnivores, mainly hyenas,  
114 access animal carcasses. At least in the base of Labeko Koba IX, carnivore activity was higher, and they  
115 would have consumed the same prey as humans (Villaluenda et al., 2012). The presence of humans is linked  
116 to strategic use as a campsite associated with a small assemblage of lithic artifacts. The most consumed  
117 species by Châtelperronian groups were red deer, followed by the consumption of large bovinds, equids, and  
118 woolly rhinoceros. During the Aurignacian period, there was some stability in human occupations, although  
119 they still alternated with carnivore occupations (Arrizabalaga et al., 2010). Cold-adapted fauna such as  
120 reindeer and woolly rhinoceros were identified in association with the Châtelperronian. Reindeer and the  
121 woolly mammoth and arctic fox were still present during the Aurignacian levels. The original sampling of  
122 the teeth studied by this work was performed in the San Sebastian Heritage Collection headquarters, where  
123 the Guipuzcoa archaeological materials were deposited at that time.

124

### 125 **Aitzbitarte III interior (Rentería, Guipúzcoa, País Vasco)**

126 Aitzbitarte III is an archaeological site located within the Landarbaso karstic system comprising nine caves  
127 (43.270; -1.8905). The cave is situated 220 m.a.s.l. and is 10 km away from the present-day coastline. Initial  
128 archaeological interventions were carried out at the end of the 19th century by P.M. de Soraluze (Altuna,  
129 2011). Recent excavations were initially conducted in the deep zone inside the cave between 1986 and  
130 1993, where the studied tooth was recovered, and later focused on the cave entrance between 1994 and  
131 2002, by J. Altuna, K. Mariezkurrena, and J. Ríos-Garaizar (Altuna et al., 2011; 2017).

132 While the cave's entrance area contains a sequence comprising possible Mousterian and Evolved  
133 Aurignacian and Gravettian levels (Altuna et al., 2011; 2013), the stratigraphy in the inner cave presents  
134 eight levels: level VIII (some tools with Mousterian features), VII (sterile), VIb, VIa and V (Middle  
135 Gravettian technocomplex with abundance of Noailles burins), IV-II (disturbed archaeological levels) and  
136 I (surface) (Altuna et al., 2017). Levels V have dates of 24,910 uncal BP (I-15208) and 23,230 uncal BP  
137 (Ua-2243); whereas level VI extends from 23,830 ± 345 uncal BP (Ua-2628) and 25,380± 430 uncal BP  
138 (Ua-2244) (Altuna, 1992; Altuna et al., 2017), with a possible outlier dated at 21,130 uncal BP (Ua-1917).

139 The Gravettian occupation in the inner part of the cave was initially thought to be more recent than the one  
140 in the cave entrance. However, it was not easy to correlate the two excavation areas due to different  
141 sedimentation rates. The abundant human occupations took place during a singular cold phase in the Middle  
142 Gravettian with a specialized paleoeconomy focused on the hunting of *Bos primigenius* and *Bison priscus*  
143 (85% in level VI and 68% in level V), which is unusual in the Cantabrian region mostly focused on red  
144 deer and ibex. Other ungulates present are *Cervus elaphus* and *Rupicapra rupicapra*, and to a lesser extent  
145 *Capra pyrenaica*, *Capreolus capreolus*, *Rangifer tarandus*, and *Equus ferus* (Altuna et al., 2017; Altuna &

146 Mariezkurrena, 2020). There is a scarce representation of carnivores. The tooth studied was sampled at the  
147 Gordailua Center for Heritage Collections of the Provincial Council of Gipuzkoa.

148

#### 149 **El Otero (Secadura, Voto, Cantabria)**

150 El Otero cave is located in Secadura (Voto) (43.3565; -3.5360), at 129 m.s.a.l and 12 km from the present-  
151 day coastline, near the Matienzo valley in a coastal plain environment covered by meadows and gentle hills.  
152 The discovery was made in 1908 by Lorenzo Sierra. The site was excavated in 1963 by J. Gonzalez  
153 Echegaray and M.A. García Guinea, in two different sectors (Sala I and Sala II) with an equivalent  
154 stratigraphic sequence (González Echegaray, 1966). Nine levels were identified in Sala I, from level IX to  
155 level I. Levels IX and VIII were initially related to the “Aurignacian-Mousterian, based on lithics  
156 assemblages with a combination of both technocomplex features. The overlying levels VI-IV were  
157 separated by a speleothem crust (level VII) and were initially related to Aurignacian, due to the presence  
158 of end-scrapers, bone points, blades, or burins on truncation (Freeman, 1964; Rios-Garaizar, 2013). Also,  
159 perforated deer, ibex, and fox teeth were found in levels V and IV. This site lacked chronological dating  
160 methods, until a selection of material from levels VI, V and IV revealed a difference in chrono-cultural  
161 attribution (Marín-Arroyo et al., 2018). Radiocarbon results yielded younger dates for such a cultural  
162 attribution and showed significant stratigraphic inconsistency. Level VI gave a result of 12,415±55 uncal  
163 BP (OxA-32585), two dates in Level V are 12,340±55 (OxA-32509) and 10,585±50 uncal BP (OxA-  
164 32510), and a date in Level IV is 15,990±80 uncal BP (OxA-32508). All these results fall into the range of  
165 the Late Upper Paleolithic (Magdalenian-Azilian initially identified in levels III-I), eliminating attribution  
166 of these levels to the Aurignacian despite the presence of apparently characteristic artefacts. Further  
167 assessments of archaeological materials will be needed.

168 Red deer dominate the assemblage, except for level IV where horses are more abundant. Wild boar, roe  
169 deer, and ibex are also present, but large bovids are relatively rare (González Echegaray, 1966). Level IV  
170 is the richest and most anthropogenic level, with evidence of butchering in red deer (captured in winter and  
171 early summer) and chamois (in autumn). The formation of this level involved humans and carnivores, and  
172 although certain data may suggest an anthropogenic predominance, the limited sample analyzed  
173 taphonomically and the pre-selection of preserved pieces do not allow for a definitive conclusion (Yravedra  
174 & Gómez-Castanedo, 2010). The material included in this work is curated at the Museo de Prehistoria y  
175 Arqueología de Cantabria (MUPAC, Santander).

176

#### 177 **S1.2. Northeastern Iberia sites**

##### 178 **Terrasses de la Riera dels Canyars (Gavà, Barcelona, Cataluña)**

179 Terrasses de la Riera dels Canyars (henceforth, Canyars) is an open-air site located near Gavà (Barcelona)  
180 (41.2961;1.9797), at 28 m.s.a.l and 3 km straight from the present-day coastline. The site lies on a fluvial  
181 terrace at the confluence of Riera dels Canyars, a torrential stream between Garraf Massif, Llobregat delta  
182 and Riera de Can Llong (Daura et al., 2013). Archaeo-paleontological remains were discovered during  
183 quarries activities in 2005 and was complete excavated on 2007 by the *Grup de Recerca del Quaternari*  
184 (Daura and Sanz, 2006; Daura et al., 2013). This intervention determined nine lithological units. The  
185 paleontological and archaeological remains come exclusively from one unit, the middle lithic unit (MLU),  
186 and specifically from layer I. The MLU is composed of coarse sandy clays and gravels, filling a  
187 paleochannel network named lower detrital unit (LDU) (Daura et al., 2013). Five radiocarbon dates were  
188 obtained on charcoals from layer I, which yield statistically consistent ages from 33,800 ±350 uncal BP to  
189 34,900 ±340 uncal BP, which results in mean age of 39,710 cal BP (from 40,890 to 38,530 cal BP) (Daura  
190 et al., 2013; this work).

191 The layer I of the site has yielded a rich faunal assemblage, consisting of over 5,000 remains. Among the  
192 herbivores, the most common species found are *Equus ferus*, *Bos primigenius*, *Equus hydruntinus*, and  
193 *Cervus elaphus* (Daura et al., 2013; Sanz-Royo et al., 2020). *Capra* sp. and *Sus scrofa* are also present,

194 although in lower frequencies. The carnivores found at the site are also noteworthy, with *Crocota crocuta*  
195 and *Lynx pardinus* being the most frequent. Presence of cold-adapted fauna associated to stepped  
196 environments is recorded, such as cf. *Mammuthus* sp., *Coelodonta antiquitatis*, and *Equus hydruntinus*.  
197 Small mammal analysis, pollen, and use-wear analysis have provided further evidence that a steppe-  
198 dominated landscape surrounded the Canyars site, supporting a correlation with the Heinrich Stadial 4, in  
199 coherence with the chronology obtained for the layer (López-García et al. 2013; 2023; Rivals et al., 2017).  
200 However, the presence of woodland is also attested by forest taxa within charcoal and pollen assemblages  
201 (Daura et al., 2013).

202 Taphonomic study is ongoing. But several evidences point that hyenas have played an important role in the  
203 accumulation of the faunal assemblage (Daura et al., 2013; Jimenez et al. 2019). However, sporadic human  
204 presence is documented by few human modifications found in faunal remains (cutmarks and fire  
205 alterations). Although the paucity of the lithic assemblage in the site, it shows a clear attribution to Upper  
206 Palaeolithic technocomplex, most likely the Early Aurignacian (Daura et al., 2013). Recently, it was  
207 documented a perforated bone fragment, which has been identified as a perforated board for leather  
208 production (Doyon et al., 2023). All teeth included in this work were sampled in *Laboratori de la Guixera*  
209 (Ajuntament de Casteldefels) where the material is stored.

210

## 211 **References Section S1**

- 212 Altuna, J. and Mariezkurrena, K.: Estrategias de caza en el Paleolítico superior de la Región Cantábrica.,  
213 Sagvntvm, Extra 21, 219–225, 2020.
- 214 Altuna, J., Mariezkurrena, K., de la Peña, P., and Rios-Garaizar, J.: Ocupaciones Humanas En La Cueva  
215 de Aitzbitarte III (Renteria, País Vasco) Sector Entrada: 33.000-18.000 BP, Serv. Cent.  
216 Publicaciones del Gob. Vasco; EKOB, 11–21, 2011.
- 217 Altuna, J., Mariezkurrena, K., de la Peña, P., and Rios-Garaizar, J.: Los niveles gravetienses de la cueva de  
218 Aitzbitarte III (Gipuzkoa). Industrias y faunas asociada, in: Pensando El Gravetiense: Nuevos  
219 Datos Para La Región Cantábrica En Su Contexto Peninsular Y Pirenaico. Monografías Del Museo  
220 Nacional Y Centro de Investigación de Altamira, 23, 184–204, 2013.
- 221 Altuna, J., Mariezkurrena, K., Rios-Garaizar, J., and San Emeterio, A.: Ocupaciones Humanas en  
222 Aitzbitarte III (País Vasco) 26.000 - 13.000 BP (zona profunda de la cueva), Servicio Central de  
223 Publicaciones del Gobierno Vasco, 348 pp., 2017.
- 224 Arrizabalaga, A.: Los tecnocomplejos líticos del yacimiento arqueológico de Labeko Koba (Arrasate, País  
225 Vasco), in: Labeko Koba (País Vasco). Hienas y Humanos en los Albores del Paleolítico Superior,  
226 Munibe (Antropología-Arkeología) 52, edited by: Arrizabalaga, A. and Altuna, J., Sociedad de  
227 Ciencias Aranzadi, San Sebastián-Donostia, 193–343, 2000a.
- 228 Arrizabalaga, A.: El yacimiento arqueológico de Labeko Koba (Arrasate, País Vasco). Entorno. Crónica de  
229 las investigaciones. Estratigrafía y estructuras. Cronología absoluta., in: Labeko Koba (País  
230 Vasco). Hienas y Humanos en los Albores del Paleolítico Superior, Munibe (Antropología-  
231 Arkeología) 52, edited by: Arrizabalaga, A. and Altuna, J., Sociedad de Ciencias Aranzadi, San  
232 Sebastián-Donostia, 15–72, 2000b.
- 233 Arrizabalaga, A. and Rios-Garaizar, J.: The Early Aurignacian in the Basque Country, *Quat. Int.*, 207, 25–  
234 36, 2009.
- 235 Arrizabalaga, A., Iriarte-Chiapusso, M. J., and Villaluenga, A.: Labeko Koba y Lezetxiki (País Vasco). Dos  
236 yacimientos, una problemática común, *Zo. Arqueol.*, 13, 322–334, 2010.
- 237 Barandiarán, J. M.: Excavaciones en Axlor. 1967- 1974, in: *Obras Completas*. Tomo XVII, edited by:  
238 Barandiarán, J. M., 341–359, 1980.
- 239 Bernaldo de Quirós, F. and Maillo-Fernández, J. M.: Middle to Upper Palaeolithic at Cantabrian Spain, in:  
240 A sourcebook of Palaeolithic transitions: methods, theories and interpretations, edited by: Camps,  
241 M. and Chauhan, P. R., Springer, New York, 341–359, 2009.
- 242 Cabrera, V., Maillo, J. M., Lloret, M., and Bernaldo de Quirós, F.: La transition vers le Paléolithique  
243 supérieur dans la grotte du Castillo (Cantabrie, Espagne) : la couche 18, *Anthropologie.*, 105, 505–  
244 532, [https://doi.org/10.1016/S0003-5521\(01\)80050-9](https://doi.org/10.1016/S0003-5521(01)80050-9), 2001.

- 245 Cabrera Valdés, V.: El Yacimiento de la cueva de «El Castillo» (Puente Viesgo, Santander), Bibliothec.,  
246 CSIC, 485 pp., 1984.
- 247 Daura, J. and Sanz, M.: Informe de la troballa del jaciment arqueològic “Terrasses dels Canyars”  
248 (Castelldefels-Gavà). Notificació de la descoberta i propostes d’actuació. Grup de Recerca del  
249 Quaternari, SERP, UB, 2006.
- 250 Daura, J., Sanz, M., García, N., Allué, E., Vaquero, M., Fierro, E., Carrión, J. S., López-García, J. M.,  
251 Blain, H. a., Sánchez-Marco, a., Valls, C., Albert, R. M., Fornós, J. J., Julià, R., Fullola, J. M.,  
252 and Zilhão, J.: Terrasses de la Riera dels Canyars (Gavà, Barcelona): The landscape of Heinrich  
253 Stadial 4 north of the “ Ebro frontier” and implications for modern human dispersal into Iberia,  
254 *Quat. Sci. Rev.*, 60, 26–48, <https://doi.org/10.1016/j.quascirev.2012.10.042>, 2013.
- 255 Demuro, M., Arnold, L. J., González-Urquijo, J., Lazuen, T., and Frochoso, M.: Chronological constraint  
256 of Neanderthal cultural and environmental changes in southwestern Europe: MIS 5–MIS 3 dating  
257 of the Axlór site (Biscay, Spain), *J. Quat. Sci.*, 38, 891–920, <https://doi.org/10.1002/jqs.3527>,  
258 2023.
- 259 Doyon, L., Faure, T., Sanz, M., Daura, J., Cassard, L., and D’Errico, F.: A 39,600-year-old leather punch  
260 board from Canyars, Gavà, Spain, *Sci. Adv.*, 9, <https://doi.org/10.1126/sciadv.adg0834>, 2023.
- 261 Freeman, L. G.: Mousterian Developments in Cantabrian Spain, University of Chicago, 1964.
- 262 Garralda, M.-D.: Los Neandertales en la Península Ibérica: The Neandertals from the Iberian Peninsula,  
263 *Munibe* 57, 289–314, 2005.
- 264 Garralda, M.-D., Maíllo-Fernández, J.-M., Maureille, B., Neira, A., and de Quirós, F. B.: &gt; 42 ka human  
265 teeth from El Castillo Cave (Cantabria, Spain) Mid-Upper Paleolithic transition, *Archaeol.*  
266 *Anthropol. Sci.*, 14, 126, <https://doi.org/10.1007/s12520-022-01587-2>, 2022.
- 267 Gómez-Olivencia, A., Arceredillo, D., Álvarez-Lao, D. J., Garate, D., San Pedro, Z., Castaños, P., and  
268 Rios-Garaizar, J.: New evidence for the presence of reindeer ( *Rangifer tarandus* ) on the Iberian  
269 Peninsula in the Pleistocene: an archaeopalaontological and chronological reassessment, *Boreas*,  
270 43, 286–308, <https://doi.org/10.1111/bor.12037>, 2014.
- 271 Gómez-Olivencia, A., Sala, N., Núñez-Lahuerta, C., Sanchis, A., Arlegi, M., and Rios-Garaizar, J.: First  
272 data of Neanderthal bird and carnivore exploitation in the Cantabrian Region (Axlór; Barandiaran  
273 excavations; Dima, Biscay, Northern Iberian Peninsula), *Sci. Rep.*, 8, 10551,  
274 <https://doi.org/10.1038/s41598-018-28377-y>, 2018.
- 275 González-Urquijo, J.: Abrigo de Axlór (Dima)., *Arkeoikuska, Investigac*, 90–93, 2001.
- 276 González-Urquijo, J., Ibáñez Estévez, J. J., Rios-Garaizar, J., Bourguignon, L., Castaños, P., and Tarrío  
277 Vinagre, A.: Excavaciones recientes en Axlór. Movilidad y planificación de actividades en grupos  
278 de neandertales, in: *Actas de La Reunión Científica: Neandertales Cantábricos. Estado de La*  
279 *Cuestión. Monografías Del Museo Nacional Y Centro de Investigación de Altamira*, 20, edited by:  
280 Montes Barquín, R. and Lasheras, J. A., Ministerio de Cultura, 527–539, 2005.
- 281 González Echegaray, J. G.: Cueva del Otero, *Excavaciones Arqueol. en España*, 53, 1966.
- 282 Jimenez, I. J., Sanz, M., Daura, J., De Gaspar, I., and García, N.: Ontogenetic dental patterns in Pleistocene  
283 hyenas ( *Crocota crocota* Erxleben, 1777) and their palaeobiological implications, *Int. J.*  
284 *Osteoarchaeol.*, 29, 808–821, <https://doi.org/10.1002/oa.2796>, 2019.
- 285 Liberda, J. J., Thompson, J. W., Rink, W. J., Bernaldo de Quirós, F., Jayaraman, R., Selvaretinam, K.,  
286 Chancellor-Maddison, K., and Volterra, V.: ESR dating of tooth enamel in Mousterian layer 20,  
287 El Castillo, Spain, *Geoarchaeology*, n/a-n/a, <https://doi.org/10.1002/gea.20320>, 2010.
- 288 López-García, J. M., Blain, H.-A., Bennàsar, M., Sanz, M., and Daura, J.: Heinrich event 4 characterized  
289 by terrestrial proxies in southwestern Europe, *Clim. Past*, 9, 1053–1064,  
290 <https://doi.org/10.5194/cp-9-1053-2013>, 2013.
- 291 López-García, J. M., Blain, H. A., Fagoaga, A., Bandera, C. S., Sanz, M., and Daura, J.: Environment and  
292 climate during the Neanderthal-AMH presence in the Garraf Massif mountain range (northeastern  
293 Iberia) from the late Middle Pleistocene to Late Pleistocene inferred from small-vertebrate  
294 assemblages, *Quat. Sci. Rev.*, 288, <https://doi.org/10.1016/j.quascirev.2022.107595>, 2022.
- 295 Luret, M., Burke, A., Bernaldo de Quiros, F., and Besse, M.: El Castillo cave (Cantabria, Spain):  
296 Archeozoological comparison between the Mousterian occupation level (unit 20) and the

297 “Aurignacien de transition de type El Castillo” (unit 18), *J. Archaeol. Sci. Reports*, 31, 102339,  
298 <https://doi.org/10.1016/j.jasrep.2020.102339>, 2020.

299 Marín-Arroyo, A. B., Rios-Garaizar, J., Straus, L. G., Jones, J. R., de la Rasilla, M., González Morales, M.  
300 R., Richards, M., Altuna, J., Mariezkurrena, K., and Ocio, D.: Chronological reassessment of the  
301 Middle to Upper Paleolithic transition and Early Upper Paleolithic cultures in Cantabrian Spain,  
302 *PLoS One*, 13, 1–20, <https://doi.org/10.1371/journal.pone.0194708>, 2018.

303 Maroto, J., Vaquero, M., Arrizabalaga, Á., Baena, J., Baquedano, E., Jordá, J., Julià, R., Montes, R., Van  
304 Der Plicht, J., Rasines, P., and Wood, R.: Current issues in late Middle Palaeolithic chronology:  
305 New assessments from Northern Iberia, *Quat. Int.*, 247, 15–25,  
306 <https://doi.org/10.1016/j.quaint.2011.07.007>, 2012.

307 Martín-Perea, D. M., Maíllo-Fernández, J., Marín, J., Arroyo, X., and Asiaín, R.: A step back to move  
308 forward: a geological re-evaluation of the El Castillo Cave Middle Palaeolithic lithostratigraphic  
309 units (Cantabria, northern Iberia), *J. Quat. Sci.*, 38, 221–234, <https://doi.org/10.1002/jqs.3473>,  
310 2023.

311 Pederzani, S., Britton, K., Jones, J. R., Agudo Pérez, L., Geiling, J. M., and Marín-Arroyo, A. B.: Late  
312 Pleistocene Neanderthal exploitation of stable and mosaic ecosystems in northern Iberia shown by  
313 multi-isotope evidence, *Quat. Res.*, 1–25, <https://doi.org/10.1017/qua.2023.32>, 2023.

314 Rink, W. J., Schwarcz, H. P., Lee, H. K., Cabrera Valdés, V., Bernaldo de Quirós, F., and Hoyos, M.: ESR  
315 dating of Mousterian levels at El Castillo Cave, Cantabria, Spain, *J. Archaeol. Sci.*, 24, 593–600,  
316 <https://doi.org/10.1006/jasc.1996.0143>, 1997.

317 Rios-Garaizar, J.: *Industria lítica y sociedad en la Transición del Paleolítico Medio al Superior en torno al*  
318 *Golfo de Bizkaia*, PUBliCan - Ediciones de la Universidad de Cantabria, 432 pp., 2012.

319 Rios-Garaizar, J.: A new chronological and technological synthesis for Late Middle Paleolithic of the  
320 Eastern Cantabrian Region, *Quat. Int.*, 433, 50–63, <https://doi.org/10.1016/j.quaint.2016.02.020>,  
321 2017.

322 Rios-Garaizar, J., Arrizabalaga, A., and Villaluenga, A.: Haltes de chasse du Châtelperronien de la  
323 Péninsule Ibérique : Labeko Koba et Ekain (Pays Basque Péninsulaire), *Anthropologie.*, 116, 532–  
324 549, <https://doi.org/10.1016/j.anthro.2012.10.001>, 2012.

325 Rios-Garaizar, J., de la Peña, P., and Maíllo-Fernández, J. M.: El final del Auriñaciense y el comienzo del  
326 Gravetiense en la región cantábrica: una visión tecno-tipológica, in: *Pensando El Gravetiense:*  
327 *Nuevos Datos Para La Región Cantábrica En Su Contexto Peninsular Y Pirenaico. Monografías*  
328 *Del Museo Nacional Y Centro de Investigación de Altamira*, 23, edited by: de las Heras, C.,  
329 Lasheras, J. A., Arrizabalaga, Á., and de la Rasilla, M., Ministerio de Educación, Cultura, Madrid,  
330 369–382, 2013.

331 Rios-Garaizar, J., Iriarte, E., Arnold, L. J., Sánchez-Romero, L., Marín-Arroyo, A. B., San Emeterio, A.,  
332 Gómez-Olivencia, A., Pérez-Garrido, C., Demuro, M., Campaña, I., Bourguignon, L., Benito-  
333 Calvo, A., Iriarte, M. J., Aranburu, A., Arranz-Otaegi, A., Garate, D., Silva-Gago, M., Lahaye, C.,  
334 and Ortega, I.: The intrusive nature of the Châtelperronian in the Iberian Peninsula, *PLoS One*, 17,  
335 e0265219, 2022.

336 Rivals, F., Uzunidis, A., Sanz, M., and Daura, J.: Faunal dietary response to the Heinrich Event 4 in  
337 southwestern Europe, *Palaeogeogr. Palaeoclim. Palaeoecol.*, 473, 123–130,  
338 <https://doi.org/10.1016/j.palaeo.2017.02.033>, 2017.

339 Sanz-Royo, A., Sanz, M., and Daura, J.: Upper Pleistocene equids from Terrasses de la Riera dels Canyars  
340 (NE Iberian Peninsula): The presence of *Equus ferus* and *Equus hydruntinus* based on dental  
341 criteria and their implications for palaeontological identification and palaeoenvironmental  
342 reconstr, *Quat. Int.*, 566–567, 78–90, <https://doi.org/10.1016/j.quaint.2020.06.026>, 2020.

343 Sanz-Royo, A., Terlató, G., and Marín-Arroyo, A. B.: Taphonomic data from the transitional Aurignacian  
344 of El Castillo cave (Spain) reveals the role of carnivores at the Aurignacian Delta level, *Quat. Sci.*  
345 *Adv.*, 13, 100147, <https://doi.org/10.1016/j.qsa.2023.100147>, 2024.

346 Vidal-Cordasco, M., Ocio, D., Hickler, T., and Marín-Arroyo, A. B.: Ecosystem productivity affected the  
347 spatiotemporal disappearance of Neanderthals in Iberia, *Nat. Ecol. Evol.*, 6, 1644–1657,  
348 <https://doi.org/10.1038/s41559-022-01861-5>, 2022.



- 349 Villaluenga, A., Arrizabalaga, Á., and Rios-Garaizar, J.: Multidisciplinary approach to two Châtelperronian  
350 series: lower IX layer of Labeko Koba and X Level of Ekain (Basque country, Spain), *J. Taphon.*,  
351 10, 525–548, 2012.
- 352 Wood, R., Bernaldo de Quirós, F., Maíllo-Fernández, J. M., Tejero, J. M., Neira, A., and Higham, T.: El  
353 Castillo (Cantabria, northern Iberia) and the Transitional Aurignacian: Using radiocarbon dating  
354 to assess site taphonomy, *Quat. Int.*, 474, 56–70, <https://doi.org/10.1016/j.quaint.2016.03.005>,  
355 2018.
- 356 Wood, R. E., Arrizabalaga, A., Camps, M., Fallon, S., Iriarte-Chiapusso, M. J., Jones, R., Maroto, J., De la  
357 Rasilla, M., Santamaría, D., Soler, J., Soler, N., Villaluenga, A., and Higham, T. F. G.: The  
358 chronology of the earliest Upper Palaeolithic in northern Iberia: New insights from L'Arbreda,  
359 Labeko Koba and La Viña, *J. Hum. Evol.*, 69, 91–109,  
360 <https://doi.org/10.1016/j.jhevol.2013.12.017>, 2014.
- 361 Yravedra, J. and Gómez-Castanedo, A.: Estudio zooarqueológico y tafonómico del yacimiento del Otero  
362 (Secadura, Voto, Cantabria), *Espac. Tiempo y Forma. Ser. I, Nueva época. Prehist. y Arqueol.*, 3,  
363 21–38, 2010.
- 364 Zilhao, J. and D'Errico, F.: The chronology of the Aurignacian and Transitional technocomplexes. Where  
365 do we stand?, in: *The chronology of the Aurignacian and of the transitional technocomplexes*  
366 *Dating, stratigraphies, cultural implications. Proceedings of Symposium 61 of the XIVth Congress*  
367 *of the UISPP*, 313–349, 2003.
- 368

369 Section S2 – Raw data

370 This material is directly available at [https://github.com/ERC-Subsilience/Ungulate\\_enamel-carbonate](https://github.com/ERC-Subsilience/Ungulate_enamel-carbonate)  
371 and Zenodo (<https://doi.org/10.5281/zenodo.13839189>).

372

373 Section S3 – Individual Bayesian Models

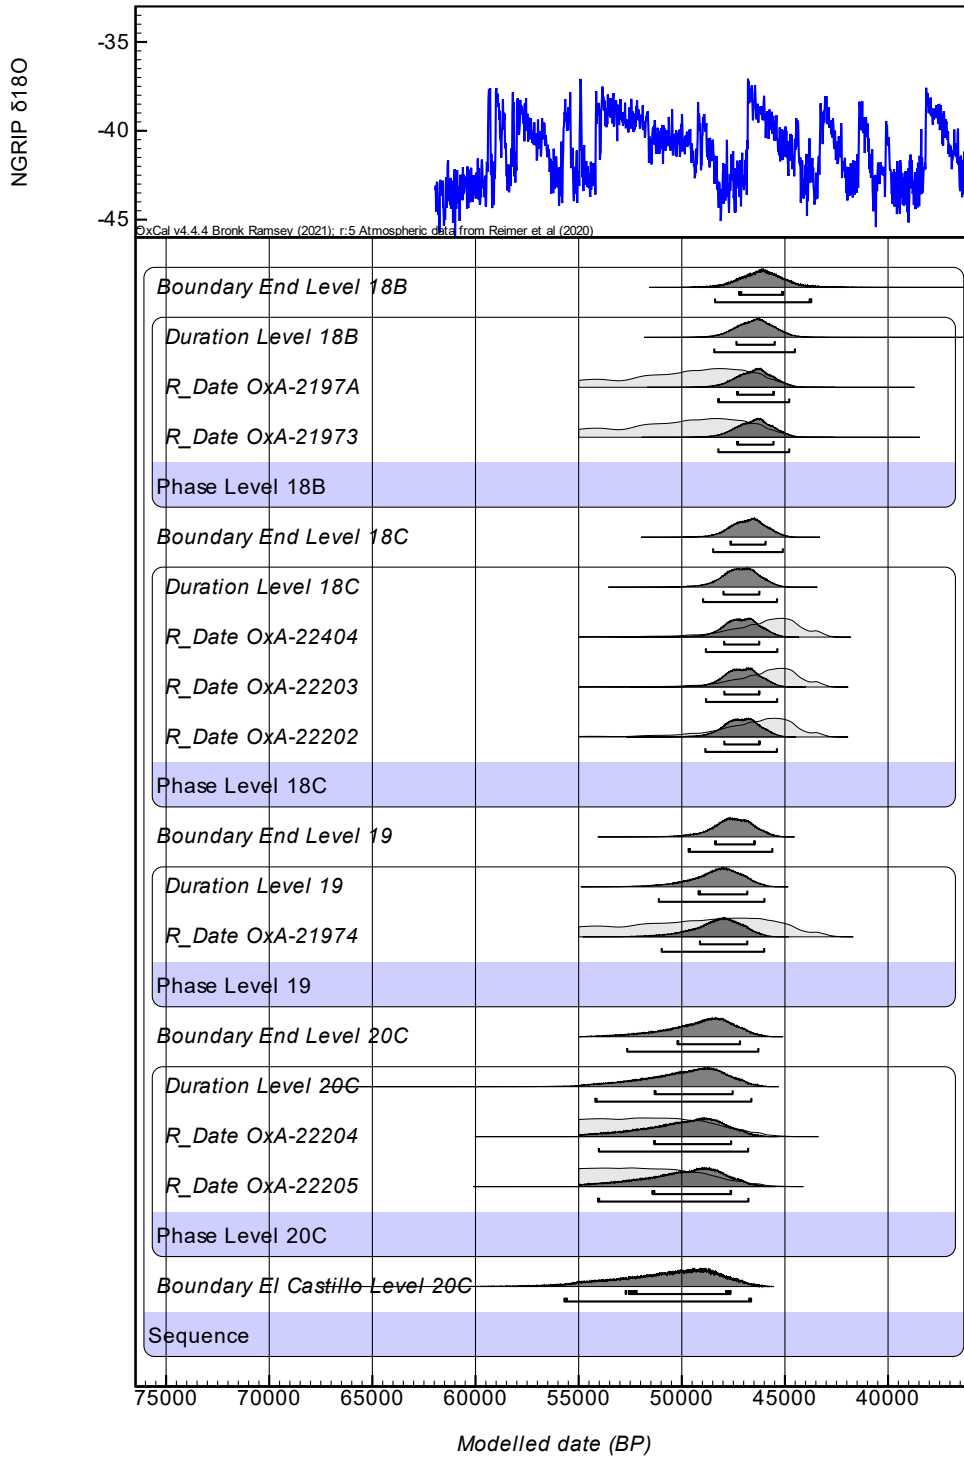

374

375 **Figure S3.1.** Radiocarbon dates from El Castillo modelled in OxCal4.4 against INTCAL20.

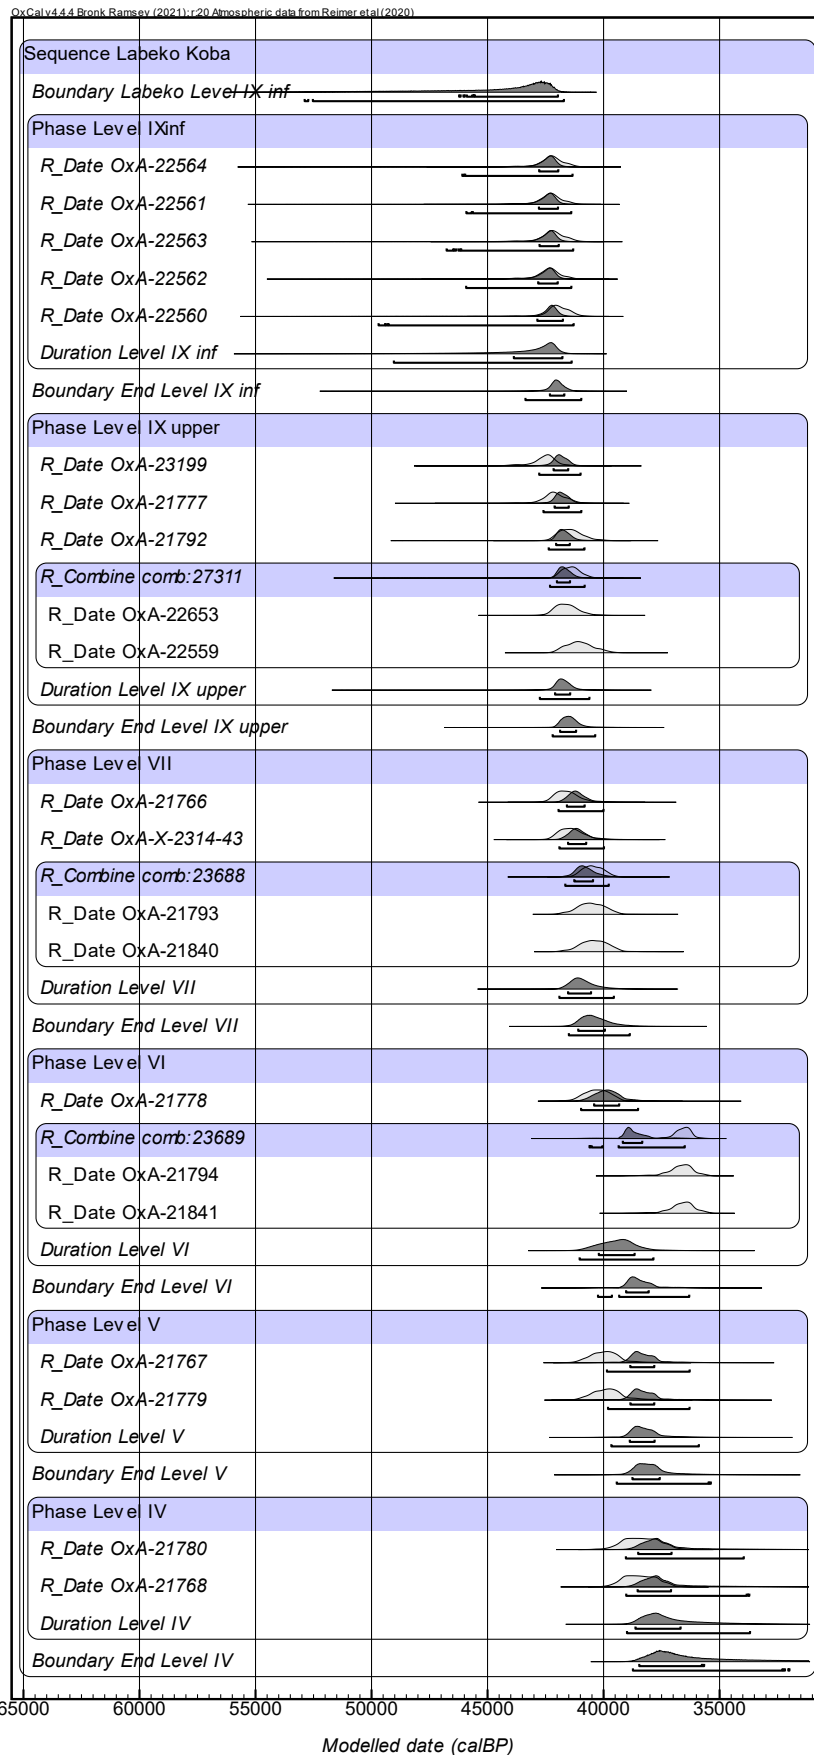

376

377

Figure S3.2. Radiocarbon dates from Labeko Koba modelled in OxCal4.4 against INTCAL20.

378

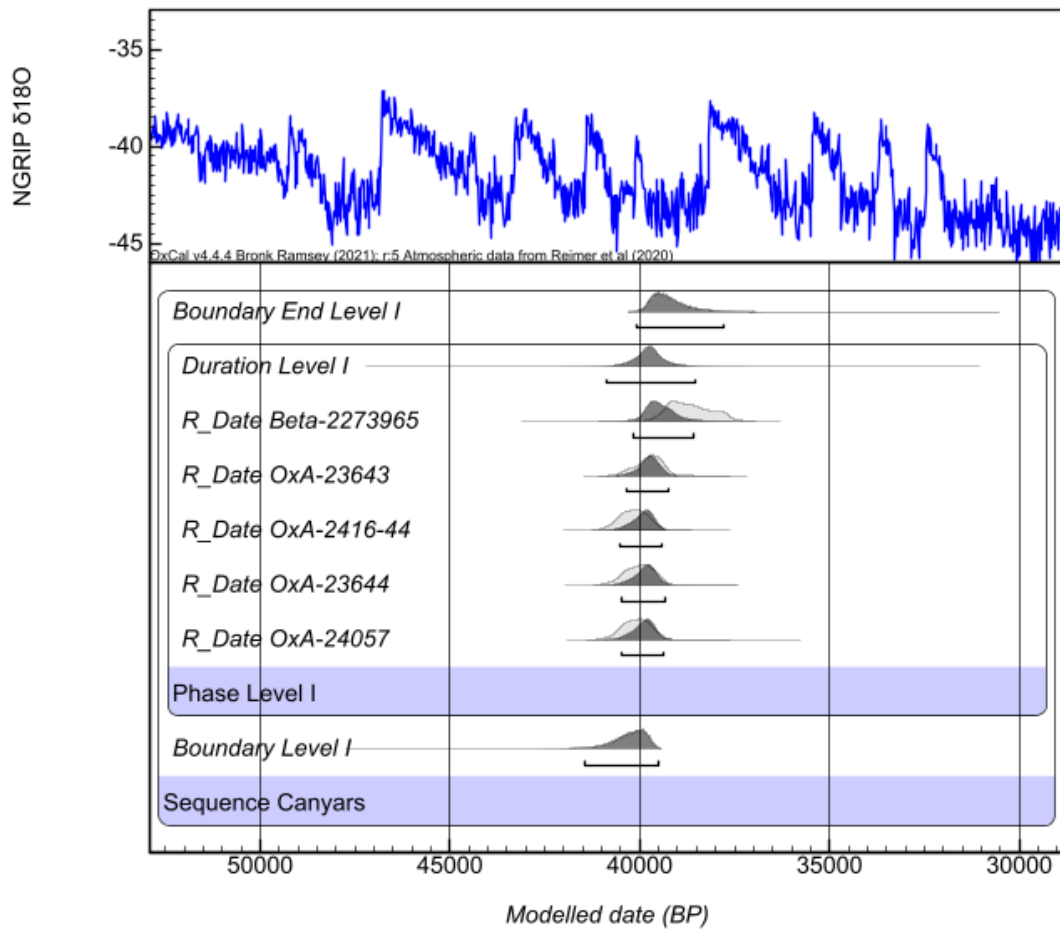

379

380

**Figure S3.3.** Radiocarbon dates from Canyars modelled in OxCal4.4 against INTCAL20.

381

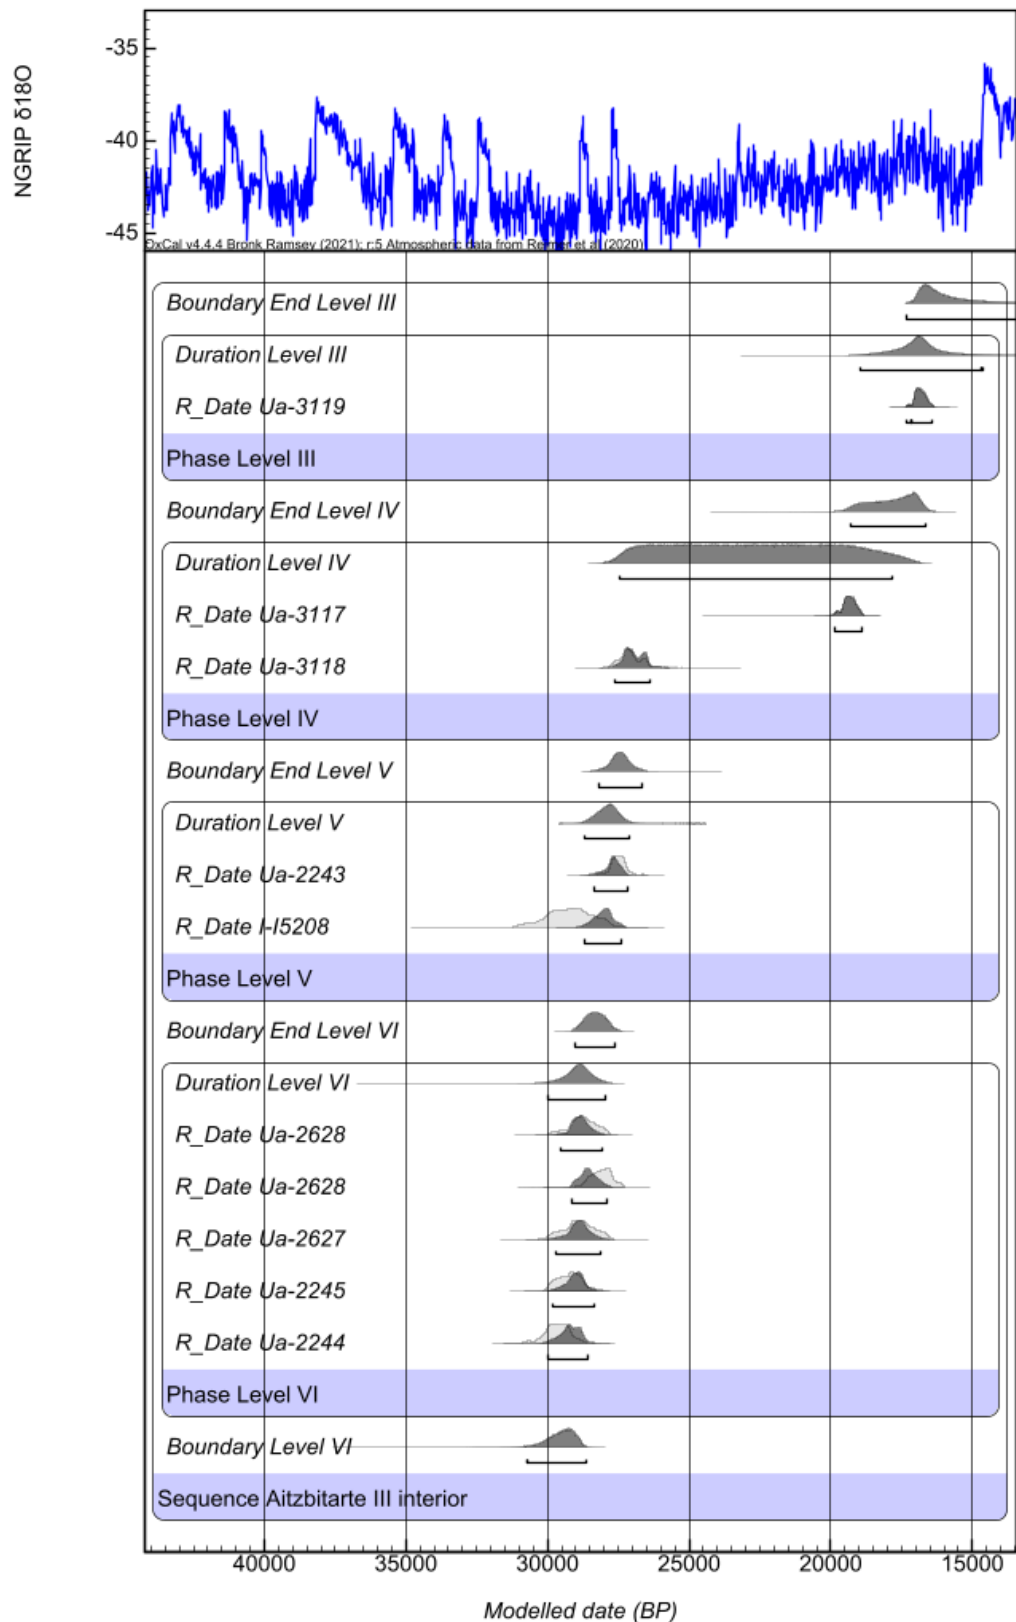

382

383 **Figure S3.4.** Radiocarbon dates from Aitzbitarte III-interior modelled in OxCal4.4 against INTCAL20.

### Section 3 – Results of Bayesian Models

| El Castillo                                | Unmodelled (BP) |          |            | Modelled (BP) |              |                   | Indices<br>Amodel 78.8,<br>Aoverall 82.4 |     |      |             |
|--------------------------------------------|-----------------|----------|------------|---------------|--------------|-------------------|------------------------------------------|-----|------|-------------|
|                                            | from            | to       | %          | from          | to           | %                 | A                                        | L   | P    | C           |
| Boundary End Level 18B                     |                 |          |            | 48383         | 43733        | 95.449.974        |                                          |     |      | 97.1        |
| <b>Duration Level 18B</b>                  |                 |          |            | <b>48438</b>  | <b>44536</b> | <b>95.449.974</b> |                                          |     |      | <b>99.8</b> |
| R_Date OxA-2197A                           | ...             | 45427    | 95.449.973 | 48235         | 44793        | 95.449.974        | 98.1                                     |     | 95.2 | 99.8        |
| R_Date OxA-21973                           | ...             | 45655    | 95.449.973 | 48240         | 44793        | 95.449.974        | 91.9                                     |     | 95.2 | 99.8        |
| Phase Level 18B                            |                 |          |            |               |              |                   |                                          |     |      |             |
| Boundary End Level 18C                     |                 |          |            | 48470         | 45117        | 95.449.974        |                                          |     |      | 99.8        |
| <b>Duration Level 18C</b>                  |                 |          |            | <b>48977</b>  | <b>45382</b> | <b>95.449.974</b> |                                          |     |      | <b>99.9</b> |
| R_Date OxA-22404                           | 49976           | 42918    | 95.449.974 | 48833         | 45383        | 95.449.974        | 82.2                                     |     | 95.3 | 99.8        |
| R_Date OxA-22203                           | 49451           | 42999    | 95.449.974 | 48819         | 45381        | 95.449.974        | 76.1                                     |     | 95.2 | 99.8        |
| R_Date OxA-22202                           | 51146           | 43039    | 95.449.974 | 48861         | 45386        | 95.449.974        | 101.2                                    |     | 95.4 | 99.8        |
| Phase Level 18C                            |                 |          |            |               |              |                   |                                          |     |      |             |
| Boundary End Level 19                      |                 |          |            | 49629         | 45623        | 95.449.974        |                                          |     |      | 99.7        |
| Duration Level 19                          |                 |          |            | 51060         | 45997        | 95.449.974        |                                          |     |      | 99.7        |
| R_Date OxA-21974                           | ...             | 44367    | 95.449.974 | 50965         | 45998        | 95.449.974        | 120.2                                    |     | 95.3 | 99.8        |
| Phase Level 19                             |                 |          |            |               |              |                   |                                          |     |      |             |
| Boundary End Level 20C                     |                 |          |            | 52583         | 46286        | 95.449.974        |                                          |     |      | 99.5        |
| <b>Duration Level 20C</b>                  |                 |          |            | <b>54134</b>  | <b>46593</b> | <b>95.449.974</b> |                                          |     |      | <b>99.3</b> |
| R_Date OxA-22204                           | ...             | 47048    | 95.449.974 | 53958         | 46713        | 95.449.974        | 94                                       |     | 95.3 | 99.3        |
| R_Date OxA-22205                           | ...             | 47348    | 95.449.974 | 53965         | 46715        | 95.449.974        | 86.9                                     |     | 95.3 | 99.3        |
| Phase Level 20C                            |                 |          |            |               |              |                   |                                          |     |      |             |
| Boundary El Castillo Level 20C<br>Sequence |                 |          |            | 55552         | 46609        | 95.449.974        |                                          |     |      | 95.3        |
| U(0)                                       | 68.268.949      | 3.99E-17 | 4          | 68.268.949    | 5.38E-17     | 3.776             |                                          | 100 |      |             |
| T(5)                                       | -2.65           | 2.65     | 95.449.974 |               |              |                   |                                          |     |      | 99.9        |
| Outlier_Model General                      |                 |          |            | -2684         | 2502         | 95.449.974        |                                          |     |      | 100         |

**Table S3.1.** Radiocarbon dates from El Castillo modelled in OxCal4.4 against INTCAL20.

| Aitzbitarte III Interior      | Unmodelled (BP) |       |           | Modelled (BP) |              |                  | Indices<br>Amodel 78.8,<br>Aoverall 82.4 |   |      |             |
|-------------------------------|-----------------|-------|-----------|---------------|--------------|------------------|------------------------------------------|---|------|-------------|
|                               | from            | to    | %         | from          | to           | %                | A                                        | L | P    | C           |
| Boundary End Level III        |                 |       |           | 17300         | 12910        | 9.544.997        |                                          |   |      | 98          |
| Duration Level III            |                 |       |           | 18960         | 14630        | 9.544.997        |                                          |   |      | 99.6        |
| R_Date Ua-3119                | 17270           | 16390 | 9.544.997 | 17300         | 16430        | 9.544.997        | 100.8                                    |   | 95.8 | 99.8        |
| Phase Level III               |                 |       |           |               |              |                  |                                          |   |      |             |
| Boundary End Level IV         |                 |       |           | 19320         | 16640        | 9.544.997        |                                          |   |      | 99.3        |
| Duration Level IV             |                 |       |           | 27430         | 17820        | 9.544.997        |                                          |   |      | 98.9        |
| R_Date Ua-3117                | 19830           | 18900 | 9.544.997 | 19840         | 18910        | 9.544.997        | 99.9                                     |   | 95.3 | 99.6        |
| R_Date Ua-3118                | 27700           | 26430 | 9.544.997 | 27600         | 26360        | 9.544.997        | 98.1                                     |   | 95.2 | 99.5        |
| Phase Level IV                |                 |       |           |               |              |                  |                                          |   |      |             |
| Boundary End Level V          |                 |       |           | 28210         | 26680        | 9.544.997        |                                          |   |      | 99.7        |
| <b>Duration Level V</b>       |                 |       |           | <b>28680</b>  | <b>27130</b> | <b>9.544.997</b> |                                          |   |      | <b>99.9</b> |
| R_Date Ua-2243                | 28260           | 26610 | 9.544.997 | 28370         | 27190        | 9.544.997        | 88.8                                     |   | 95.4 | 99.8        |
| R_Date I-15208                | 30830           | 27760 | 9.544.997 | 28710         | 27370        | 9.544.997        | 57.7                                     |   | 94.8 | 99.8        |
| Phase Level V                 |                 |       |           |               |              |                  |                                          |   |      |             |
| Boundary End Level VI         |                 |       |           | 29010         | 27630        | 9.544.997        |                                          |   |      | 99.7        |
| Duration Level VI             |                 |       |           | 29990         | 27930        | 9.544.997        |                                          |   |      | 99.8        |
| R_Date Ua-2628                | 29760           | 27840 | 9.544.997 | 29570         | 28080        | 9.544.997        | 118.2                                    |   | 96   | 99.8        |
| R_Date Ua-2628                | 28760           | 27360 | 9.544.997 | 29150         | 27920        | 9.544.997        | 67                                       |   | 94.3 | 99.8        |
| R_Date Ua-2627                | 29920           | 27870 | 9.544.997 | 29680         | 28110        | 9.544.997        | 120.5                                    |   | 96   | 99.8        |
| R_Date Ua-2245                | 30070           | 28280 | 9.544.997 | 29820         | 28360        | 9.544.997        | 108                                      |   | 95.9 | 99.8        |
| R_Date Ua-2244                | 30720           | 28760 | 9.544.997 | 30010         | 28570        | 9.544.997        | 77.7                                     |   | 94.9 | 99.7        |
| Phase Level VI                |                 |       |           |               |              |                  |                                          |   |      |             |
| Boundary Level VI<br>Sequence |                 |       |           | 30730         | 28650        | 9.544.997        |                                          |   |      | 96          |
| U(0,4)                        | 3.99E-17        | 4     | 9.544.997 | 5.38E-17      | 3.772        | 9.544.997        | 100                                      |   |      | 99          |
| T(5)                          | -2.65           | 2.65  | 9.544.997 |               |              |                  |                                          |   |      | 95.5        |
| Outlier_Model General         |                 |       |           | -1420         | 1280         | 9.544.997        |                                          |   |      | 99.9        |

**Table S3.2.** Radiocarbon dates from Labeko Koba modelled in OxCal4.4 against INTCAL20.

| Canyars                 | Unmodelled (BP) |       |           | Modelled (BP) |              |              | Indices<br>Amodel 78.8,<br>Aoverall 82.4 |      |             |
|-------------------------|-----------------|-------|-----------|---------------|--------------|--------------|------------------------------------------|------|-------------|
|                         |                 |       |           |               |              |              |                                          |      |             |
| Boundary End Level I    |                 |       |           | 40090         | 37770        | 95.45        |                                          |      | 95.3        |
| <b>Duration Level I</b> |                 |       |           | <b>40890</b>  | <b>38530</b> | <b>95.45</b> |                                          |      | <b>99.7</b> |
| R_Date Beta-2273965     | 39630           | 37570 | 9.544.997 | 40190         | 38560        | 95.45        | 63.2                                     | 93.4 | 99.6        |
| R_Date OxA-23643        | 40520           | 39140 | 9.544.997 | 40330         | 39240        | 95.45        | 114.2                                    | 96.1 | 99.8        |
| R_Date OxA-2416-44      | 40880           | 39450 | 9.544.997 | 40540         | 39400        | 95.45        | 99.2                                     | 96   | 99.8        |
| R_Date OxA-23644        | 40740           | 39300 | 9.544.997 | 40470         | 39340        | 95.45        | 110.5                                    | 96   | 99.8        |
| R_Date OxA-24057        | 40790           | 39390 | 9.544.997 | 40490         | 39380        | 95.45        | 104.3                                    | 96   | 99.8        |
| Phase Level I           |                 |       |           |               |              |              |                                          |      |             |
| Boundary Level I        |                 |       |           | 41450         | 39500        | 95.45        |                                          |      | 96.6        |
| Sequence Canyars        |                 |       |           |               |              |              |                                          |      |             |
| U(0,4)                  | 3.99E-17        | 4     | 9.544.997 | 5.38E-17      | 3.82         | 95.45        | 100                                      |      | 100         |
| T(5)                    | -2.65           | 2.65  | 9.544.997 |               |              |              |                                          |      | 99.4        |
| Outlier_Model General   |                 |       |           | -800          | 1480         | 95.45        |                                          |      | 99.9        |

**Table S3.3.** Radiocarbon dates from Canyars modelled in OxCal4.4 against INTCAL20.

| Labeko Koba                    | Unmodelled (BP) |       |           | Modelled (BP) |              |                  | Indices<br>Amodel 78.8,<br>Aoverall 82.4 |   |      |             |
|--------------------------------|-----------------|-------|-----------|---------------|--------------|------------------|------------------------------------------|---|------|-------------|
|                                | from            | to    | %         | from          | to           | %                | A                                        | L | P    | C           |
| Boundary End Level IV          |                 |       |           | 38710         | 32030        | 9.544.997        |                                          |   |      | 98.4        |
| <b>Duration Level IV</b>       |                 |       |           | <b>39000</b>  | <b>33710</b> | <b>9.544.997</b> |                                          |   |      | <b>99.8</b> |
| R_Date OxA-21768               | 39700           | 37030 | 9.544.997 | 39050         | 33820        | 9.544.997        | 75.5                                     |   | 80   | 99.8        |
| R_Date OxA-21780               | 39780           | 36910 | 9.544.997 | 39050         | 33960        | 9.544.997        | 81.3                                     |   | 82.3 | 99.8        |
| Phase Level IV                 |                 |       |           |               |              |                  |                                          |   |      |             |
| Boundary End Level V           |                 |       |           | 39470         | 35440        | 9.544.997        |                                          |   |      | 99.8        |
| <b>Duration Level V</b>        |                 |       |           | <b>39730</b>  | <b>35950</b> | <b>9.544.997</b> |                                          |   |      | <b>99.8</b> |
| R_Date OxA-21779               | 41170           | 38260 | 9.544.997 | 39830         | 36330        | 9.544.997        | 21                                       |   | 87.2 | 99.8        |
| R_Date OxA-21767               | 41230           | 38500 | 9.544.997 | 39860         | 36340        | 9.544.997        | 15.5                                     |   | 85.5 | 99.8        |
| Phase Level V                  |                 |       |           |               |              |                  |                                          |   |      |             |
| Boundary End Level VI          |                 |       |           | 40240         | 36360        | 9.544.997        |                                          |   |      | 99.8        |
| <b>Duration Level VI</b>       |                 |       |           | <b>41030</b>  | <b>37860</b> | <b>9.544.997</b> |                                          |   |      | <b>99.9</b> |
| R_Date OxA-21841               | 37710           | 35420 | 9.544.997 |               |              |                  |                                          |   |      |             |
| R_Date OxA-21794               | 38040           | 35460 | 9.544.997 |               |              |                  |                                          |   |      |             |
| R_Combine comb:23689           | 37350           | 35900 | 9.544.997 | 40620         | 36500        | 9.544.997        | 4.3                                      |   |      | 99.8        |
| R_Date OxA-21778               | 41390           | 39190 | 9.544.997 | 40970         | 38550        | 9.544.997        | 90                                       |   | 94.4 | 99.9        |
| Phase Level VI                 |                 |       |           |               |              |                  |                                          |   |      |             |
| Boundary End Level VII         |                 |       |           | 41490         | 38890        | 9.544.997        |                                          |   |      | 99.9        |
| <b>Duration Level VII</b>      |                 |       |           | <b>41910</b>  | <b>39570</b> | <b>9.544.997</b> |                                          |   |      | <b>99.9</b> |
| R_Date OxA-21840               | 41610           | 39250 | 9.544.997 |               |              |                  |                                          |   |      |             |
| R_Date OxA-21793               | 41720           | 39390 | 9.544.997 |               |              |                  |                                          |   |      |             |
| R_Combine comb:23688           | 41290           | 39570 | 9.544.997 | 41650         | 39780        | 9.544.997        | 87.3                                     |   |      | 99.9        |
| R_Date OxA-X-2314-43           | 42350           | 40260 | 9.544.997 | 41900         | 40000        | 9.544.997        | 96.5                                     |   | 95.4 | 99.9        |
| R_Date OxA-21766               | 42520           | 40530 | 9.544.997 | 41950         | 40020        | 9.544.997        | 80.3                                     |   | 94.6 | 99.9        |
| Phase Level VII                |                 |       |           |               |              |                  |                                          |   |      |             |
| Boundary End Level IX upper    |                 |       |           | 42190         | 40360        | 9.544.997        |                                          |   |      | 99.9        |
| <b>Duration Level IX upper</b> |                 |       |           | <b>42750</b>  | <b>40580</b> | <b>9.544.997</b> |                                          |   |      | <b>99.9</b> |
| R_Date OxA-22559               | 42090           | 39850 | 9.544.997 |               |              |                  |                                          |   |      |             |
| R_Date OxA-22653               | 42520           | 40530 | 9.544.997 |               |              |                  |                                          |   |      |             |
| R_Combine comb:27311           | 42120           | 40600 | 9.544.997 | 42330         | 40800        | 9.544.997        | 95                                       |   |      | 99.9        |
| R_Date OxA-21792               | 42370           | 40330 | 9.544.997 | 42380         | 40820        | 9.544.997        | 113.4                                    |   | 95.7 | 99.9        |
| R_Date OxA-21777               | 43160           | 40960 | 9.544.997 | 42600         | 40950        | 9.544.997        | 99.5                                     |   | 95.6 | 99.9        |
| R_Date OxA-23199               | 43980           | 41490 | 9.544.997 | 42800         | 40990        | 9.544.997        | 52.4                                     |   | 92.8 | 99.9        |
| Phase Level IX upper           |                 |       |           |               |              |                  |                                          |   |      |             |
| Boundary End Level IX inf      |                 |       |           | 43420         | 40970        | 9.544.997        |                                          |   |      | 99.9        |
| <b>Duration Level IX inf</b>   |                 |       |           | <b>48940</b>  | <b>41340</b> | <b>9.544.997</b> |                                          |   |      | <b>99.8</b> |
| R_Date OxA-22560               | 42780           | 40980 | 9.544.997 | 49670         | 41300        | 9.544.997        | 75.3                                     |   | 76   | 99.8        |
| R_Date OxA-22562               | 43830           | 41220 | 9.544.997 | 45860         | 41380        | 9.544.997        | 102.8                                    |   | 90.9 | 99.8        |
| R_Date OxA-22563               | 43250           | 41010 | 9.544.997 | 46280         | 41300        | 9.544.997        | 99.1                                     |   | 89.7 | 99.8        |
| R_Date OxA-22561               | 43790           | 41130 | 9.544.997 | 45920         | 41340        | 9.544.997        | 102.3                                    |   | 90.7 | 99.8        |
| R_Date OxA-22564               | 43370           | 41050 | 9.544.997 | 46060         | 41320        | 9.544.997        | 101                                      |   | 90.2 | 99.8        |
| Phase Level IX inf             |                 |       |           |               |              |                  |                                          |   |      |             |
| Boundary Labeko Level IX inf   |                 |       |           | 52660         | 41740        | 9.544.997        |                                          |   |      | 96.6        |
| Sequence Labeko Koba           |                 |       |           |               |              |                  |                                          |   |      |             |
| N(0,2)                         | -4              | 4     | 9.544.997 |               |              |                  |                                          |   |      | 99.4        |
| Outlier_Model SSimple          |                 |       |           | ...           | 840          | 9.544.997        |                                          |   |      | 97.5        |
| U(0,4)                         | 3.99E-17        | 4     | 9.544.997 | 5.38E-17      | 3.932        | 9.544.997        | 100                                      |   |      | 98.3        |
| T(5)                           | -2.65           | 2.65  | 9.544.997 |               |              |                  |                                          |   |      | 97.5        |
| Outlier_Model General          |                 |       |           | -6130         | 9280         | 9.544.997        |                                          |   |      | 99.4        |

**Table S3.4.** Radiocarbon dates from Aitzbitarte III-interior modelled in OxCal4.4 against INTCAL20.

## Section 4 – Intra-tooth curve plots

Original curves derived from enamel intra-tooth sampling on enamel carbonate provided by sites. In blue, oxygen stable isotope composition ( $\delta^{18}\text{O}$ ), and, in brown, carbon stable isotope composition ( $\delta^{13}\text{C}$ ). In the x-axis, the distance from the Enamel Root Junction (ERJ). Notice that the y-axis can experience some variations between sites.

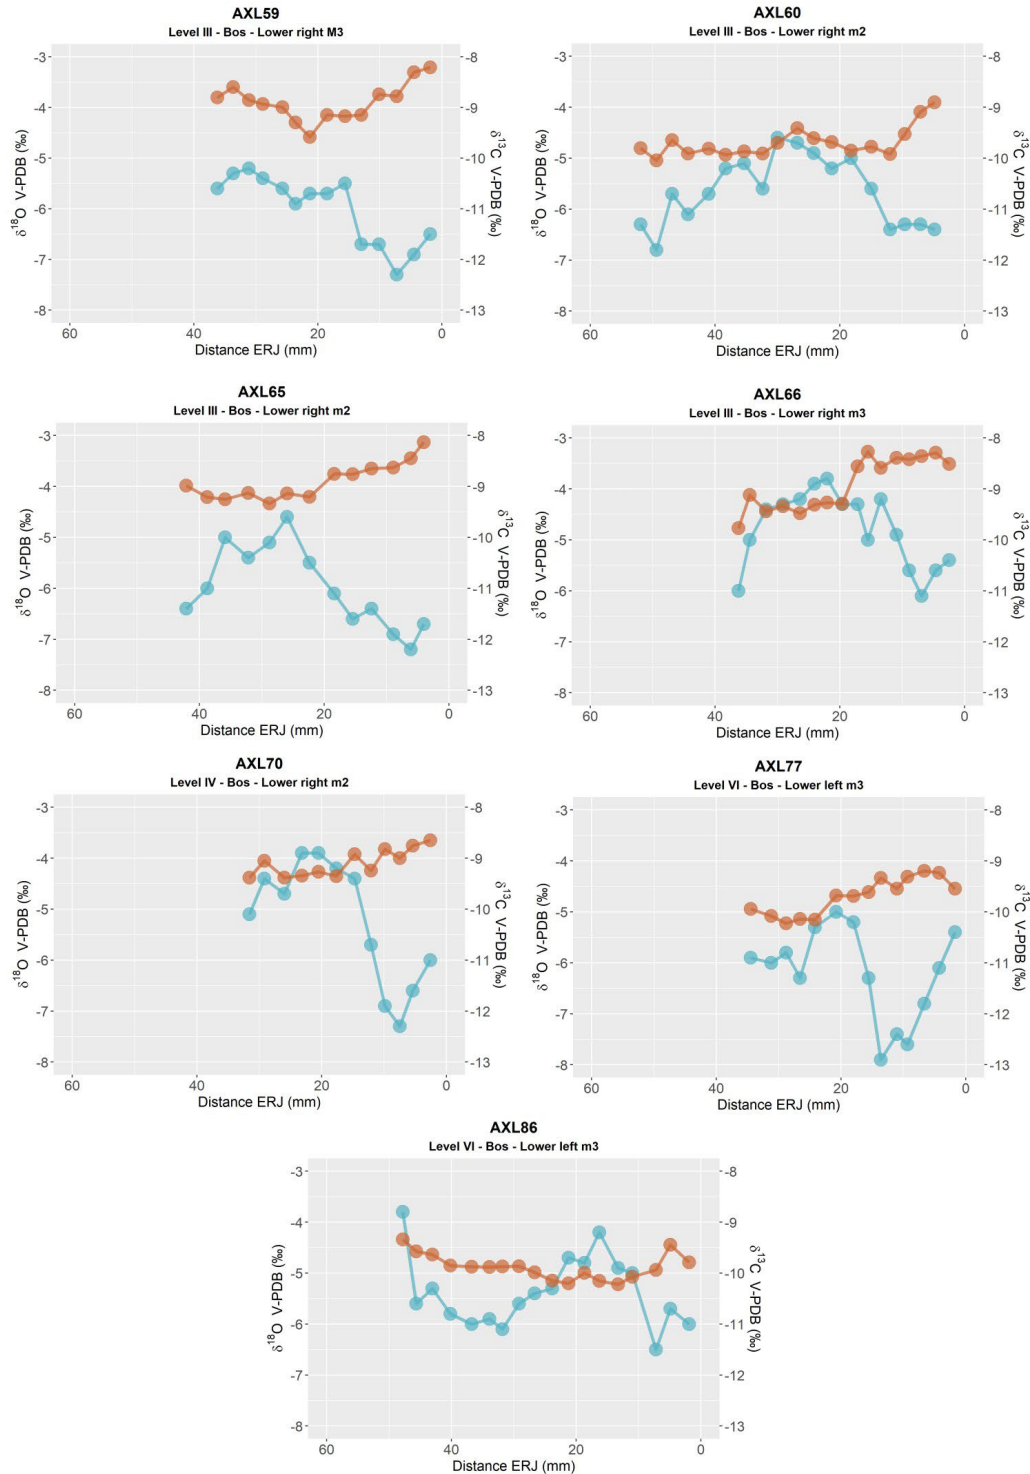

**Figure S4.1.** Intra-tooth plots of oxygen ( $\delta^{18}\text{O}$ ) and carbon ( $\delta^{13}\text{C}$ ) isotope composition from teeth from Axlor, considering distance from enamel root junction (ERC).



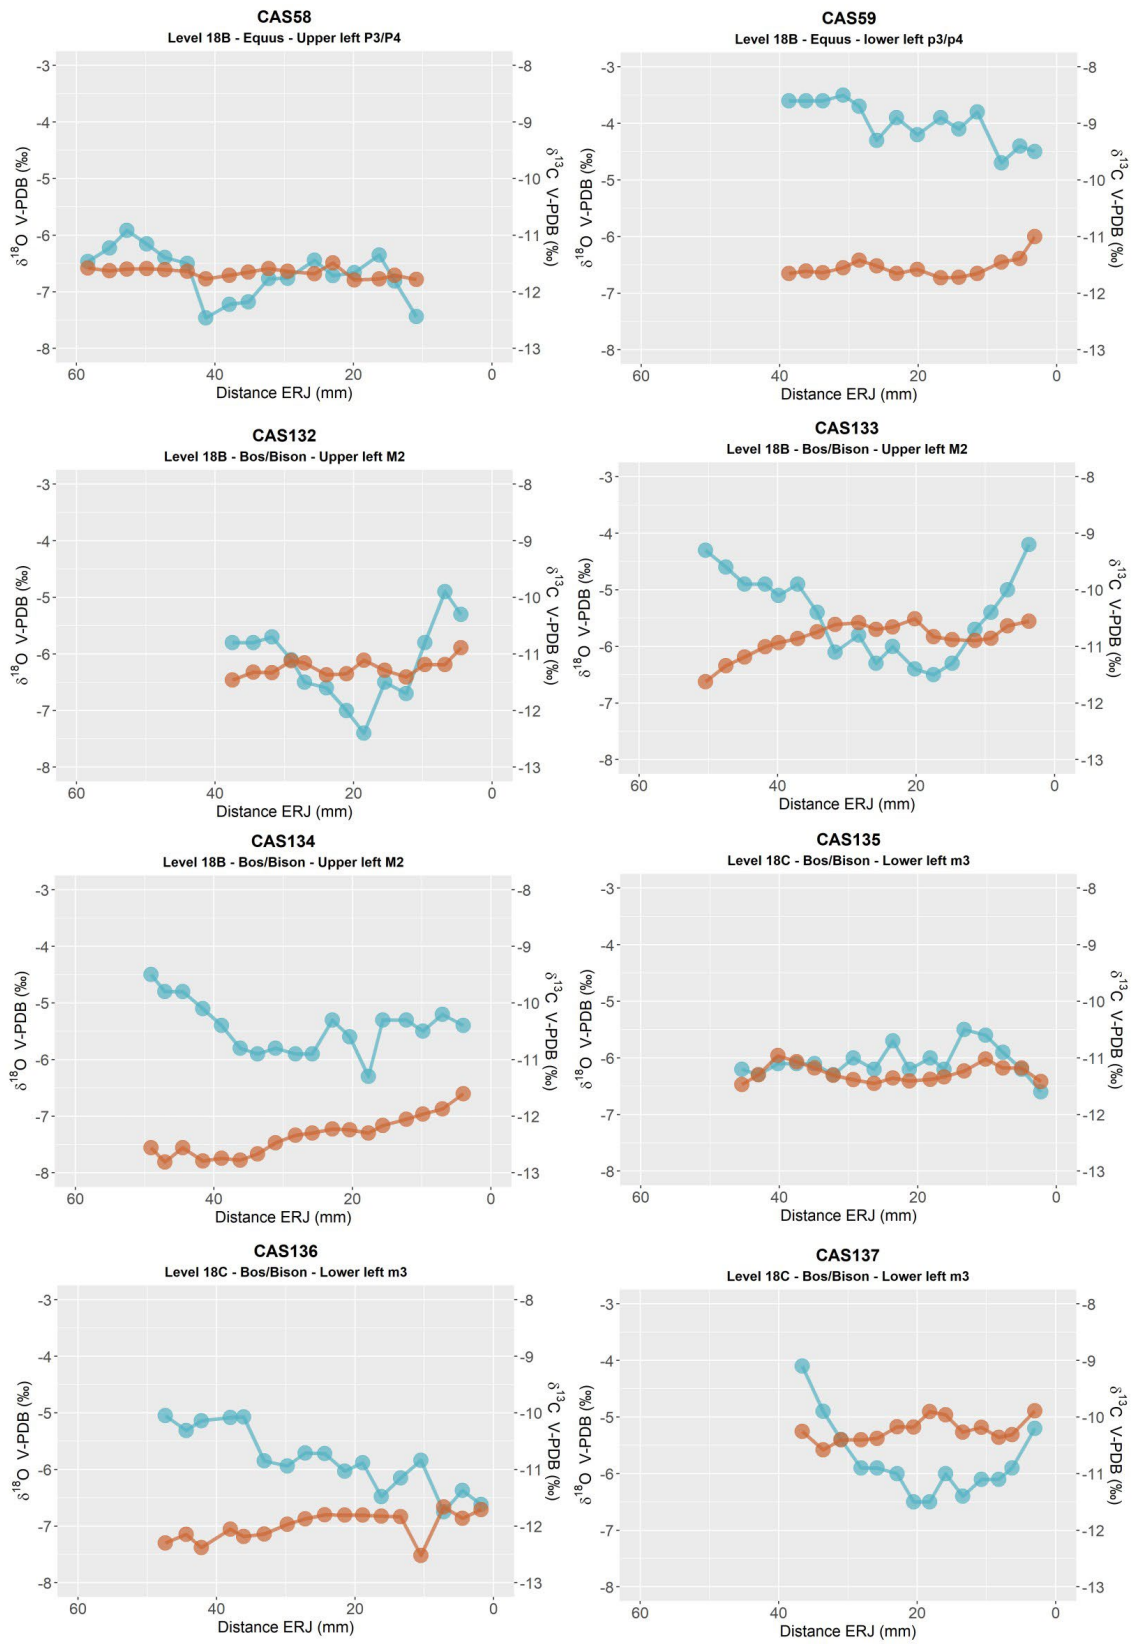

**Figure S4.2.** Intra-tooth plots of oxygen ( $\delta^{18}\text{O}$ ) and carbon ( $\delta^{13}\text{C}$ ) isotope composition from teeth from El Castillo, considering the sample's distance from the enamel root junction (ERC).

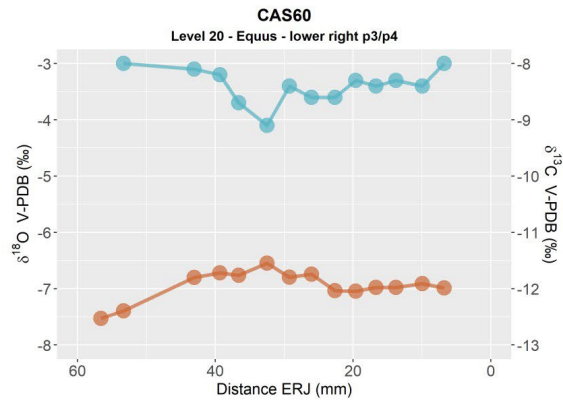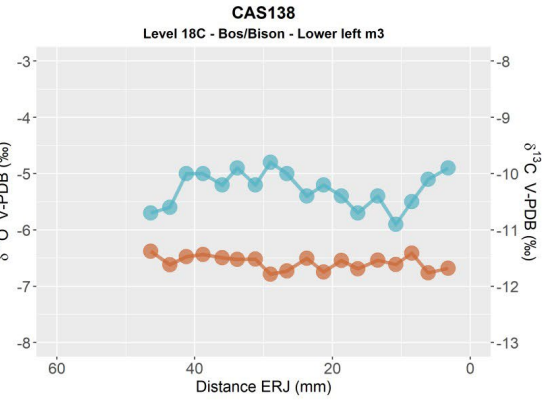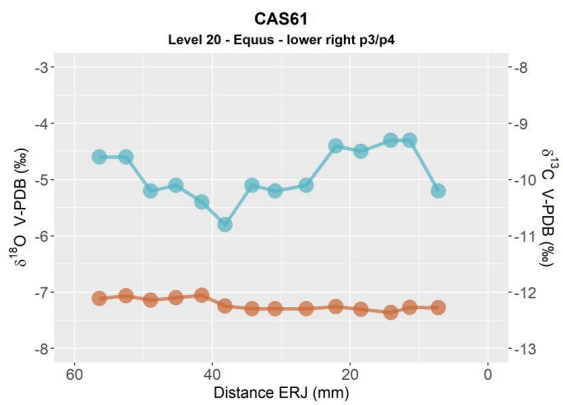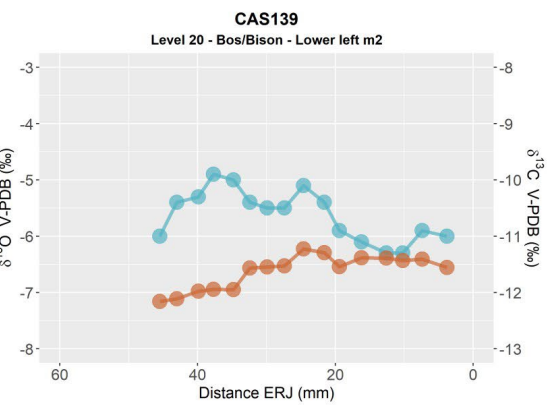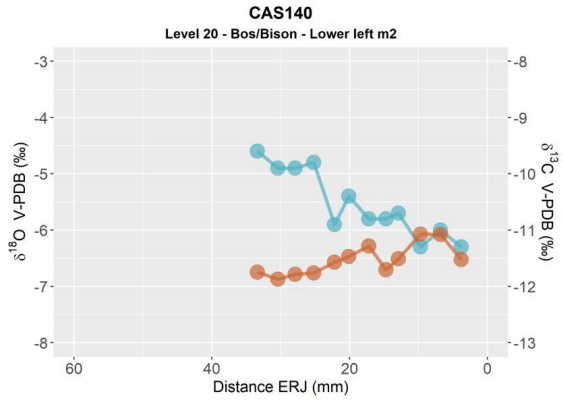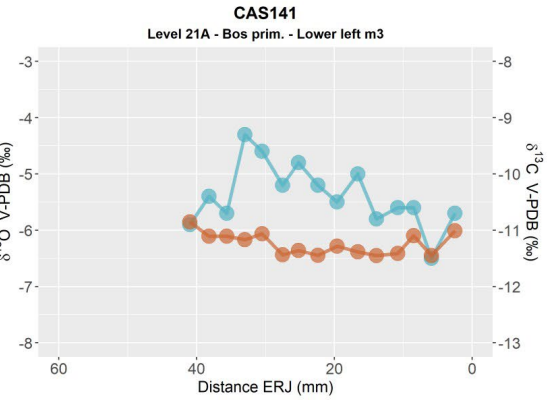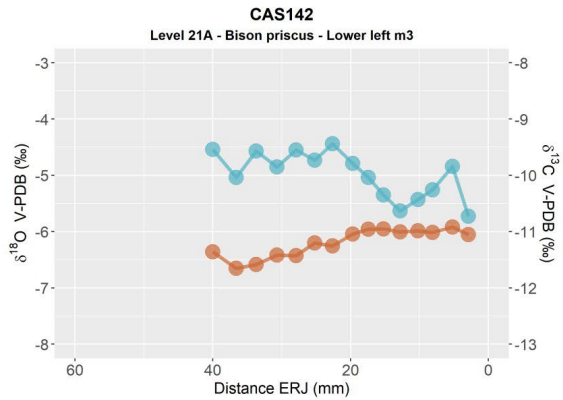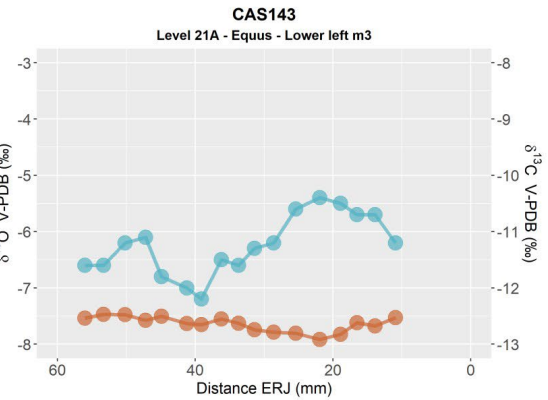

**Figure S4.3.** Intra-tooth plots of oxygen ( $\delta^{18}\text{O}$ ) and carbon ( $\delta^{13}\text{C}$ ) isotope composition from teeth from El Castillo, considering the sample's distance from the enamel root junction (ERC).

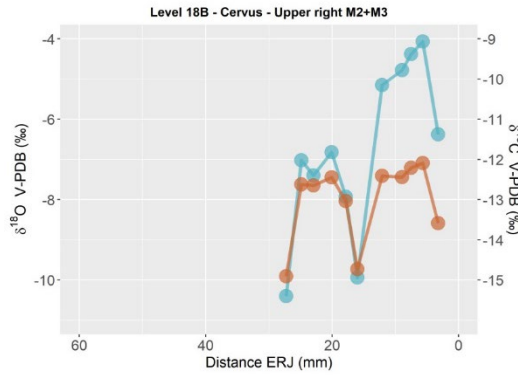

**Figure S4.4.** Intra-tooth plots of oxygen ( $\delta^{18}\text{O}$ ) and carbon ( $\delta^{13}\text{C}$ ) isotope composition from teeth from El Castillo, considering the sample's distance from the enamel root junction (ERC).

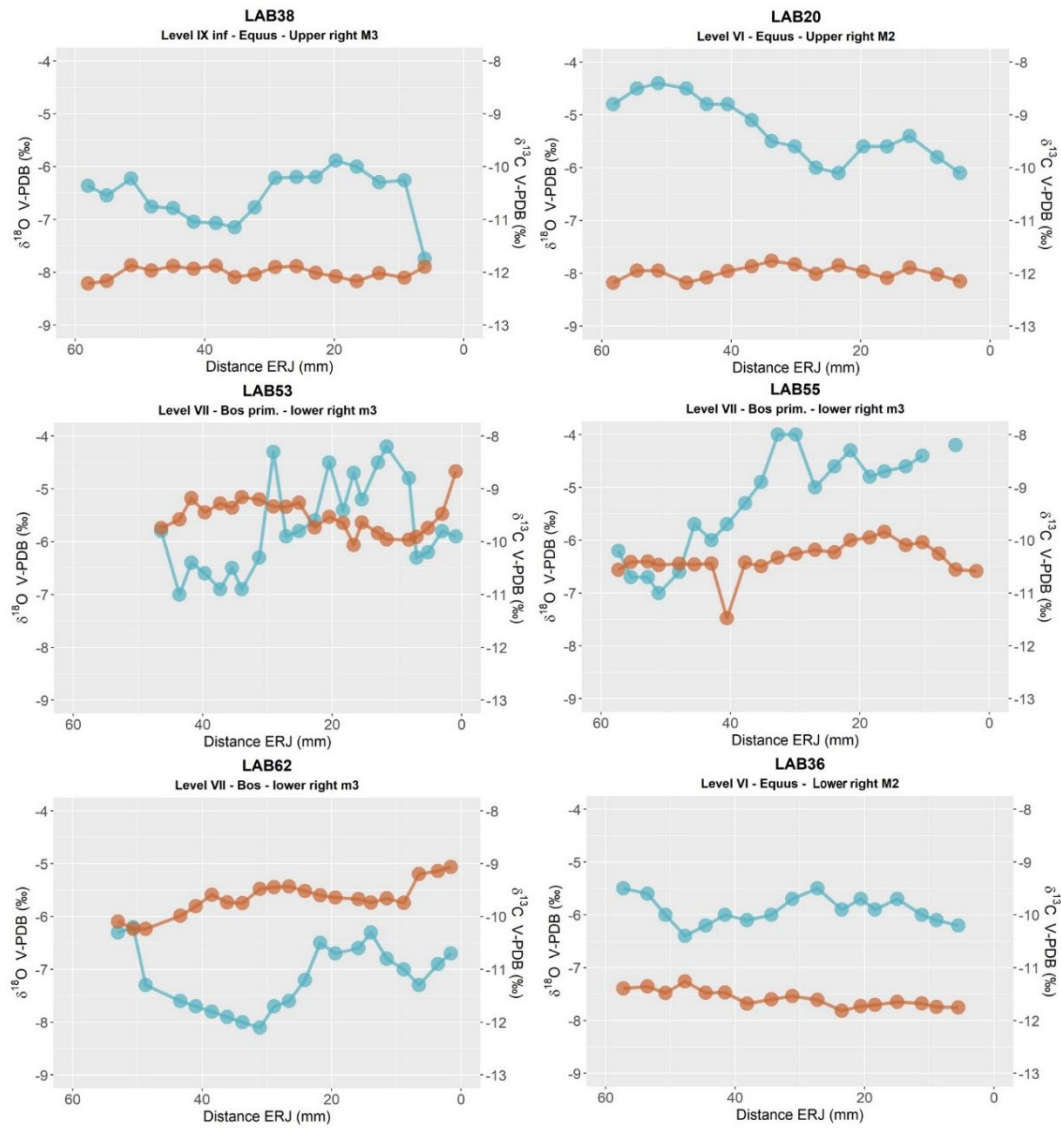

**Figure S4.5.** Intra-tooth plots of oxygen ( $\delta^{18}\text{O}$ ) and carbon ( $\delta^{13}\text{C}$ ) isotope composition from teeth from Labeko Koba, considering the sample's distance from the enamel root junction (ERC).

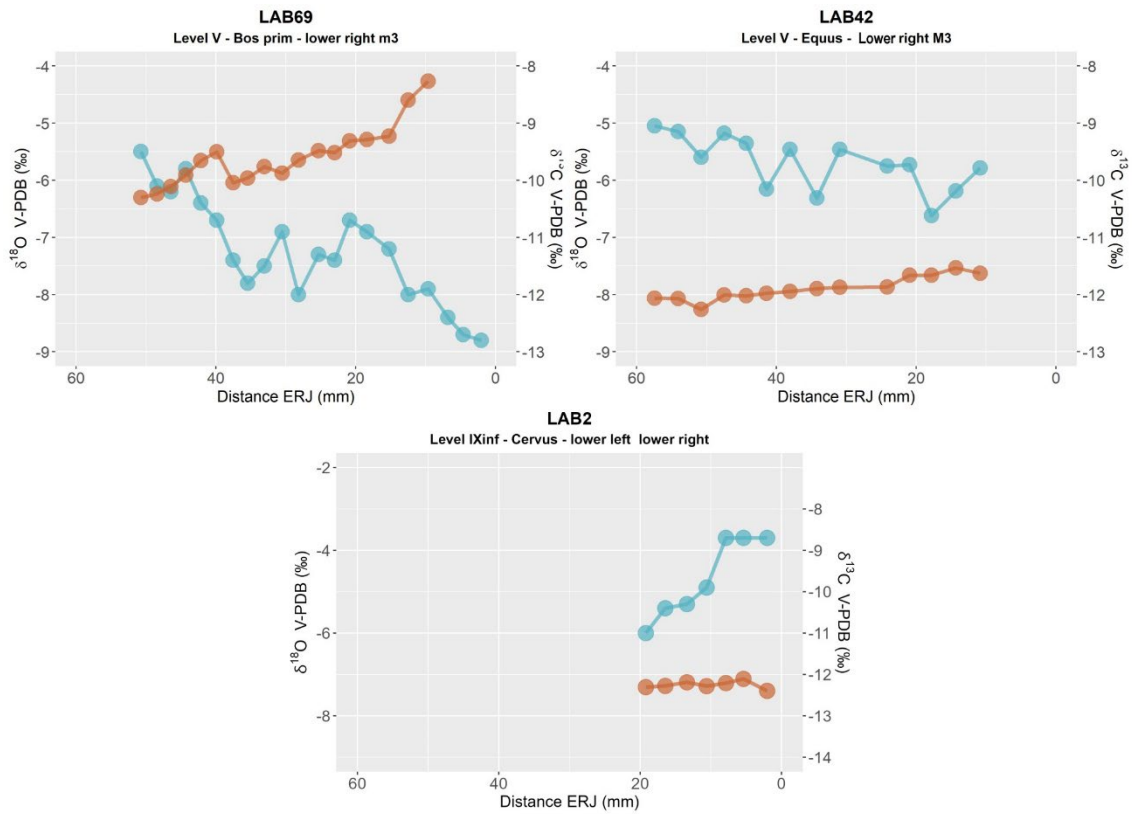

**Figure S4.6.** Intra-tooth plots of oxygen ( $\delta^{18}\text{O}$ ) and carbon ( $\delta^{13}\text{C}$ ) isotope composition from teeth from Labeko Koba, considering the sample's distance from the enamel root junction (ERC).

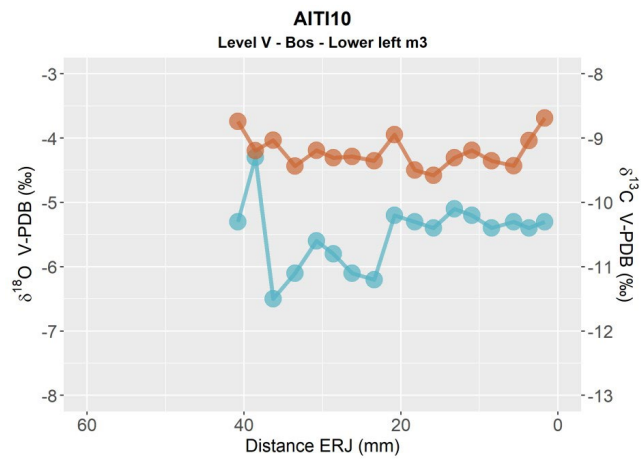

**Figure S4.7.** Intra-tooth plots of oxygen ( $\delta^{18}\text{O}$ ) and carbon ( $\delta^{13}\text{C}$ ) isotope composition from teeth from Aitzbitarte III interior, considering the sample's distance from the enamel root junction (ERC).

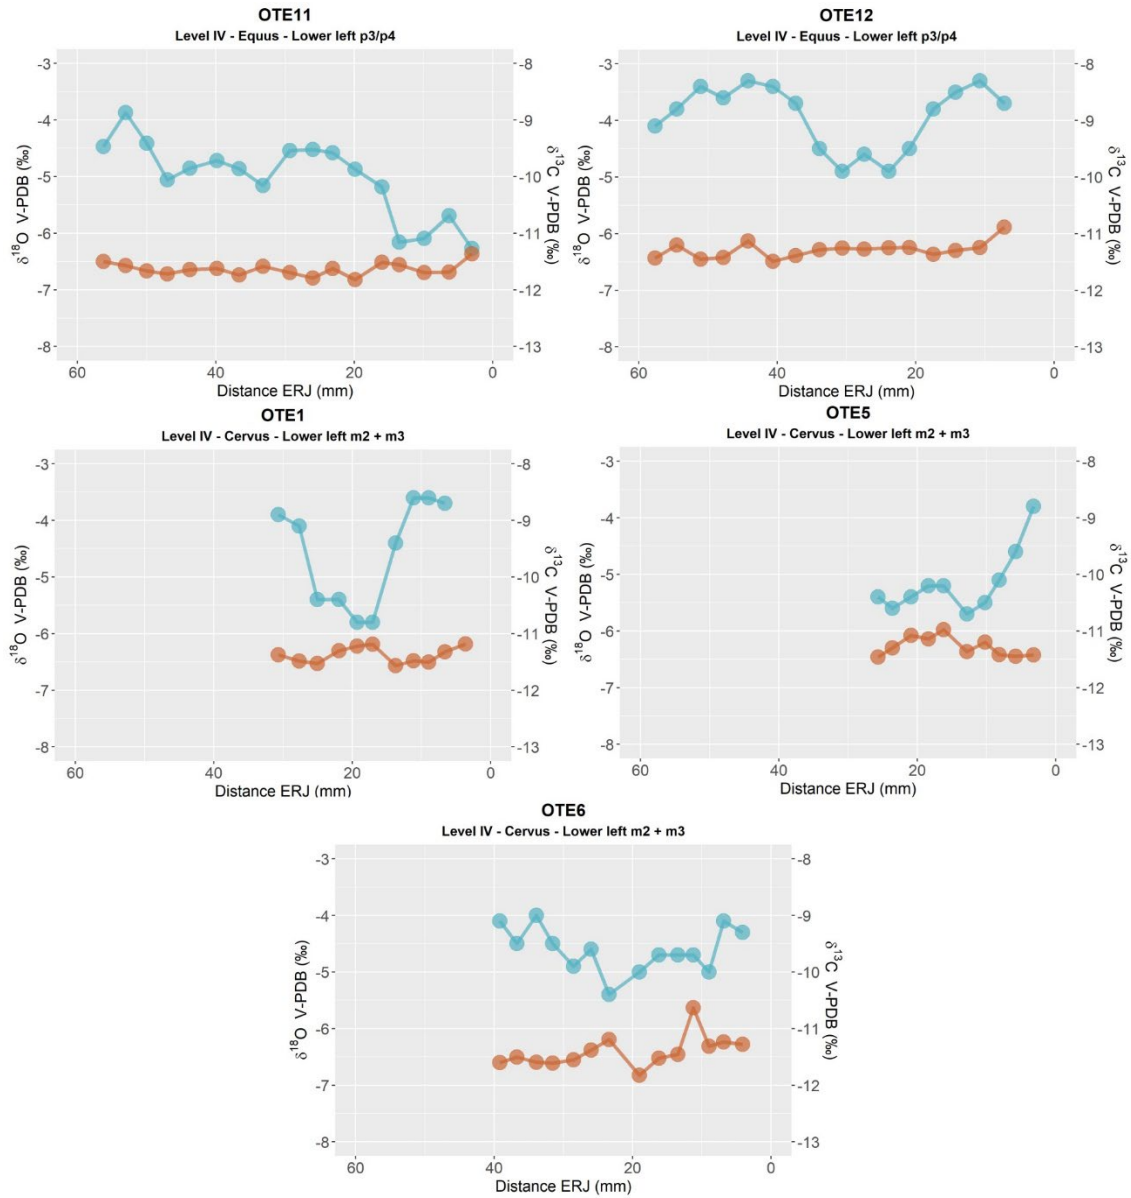

**Figure S4.8.** Intra-tooth plots of oxygen ( $\delta^{18}\text{O}$ ) and carbon ( $\delta^{13}\text{C}$ ) isotope composition from teeth from El Otero, considering the sample's distance from the enamel root junction (ERC).

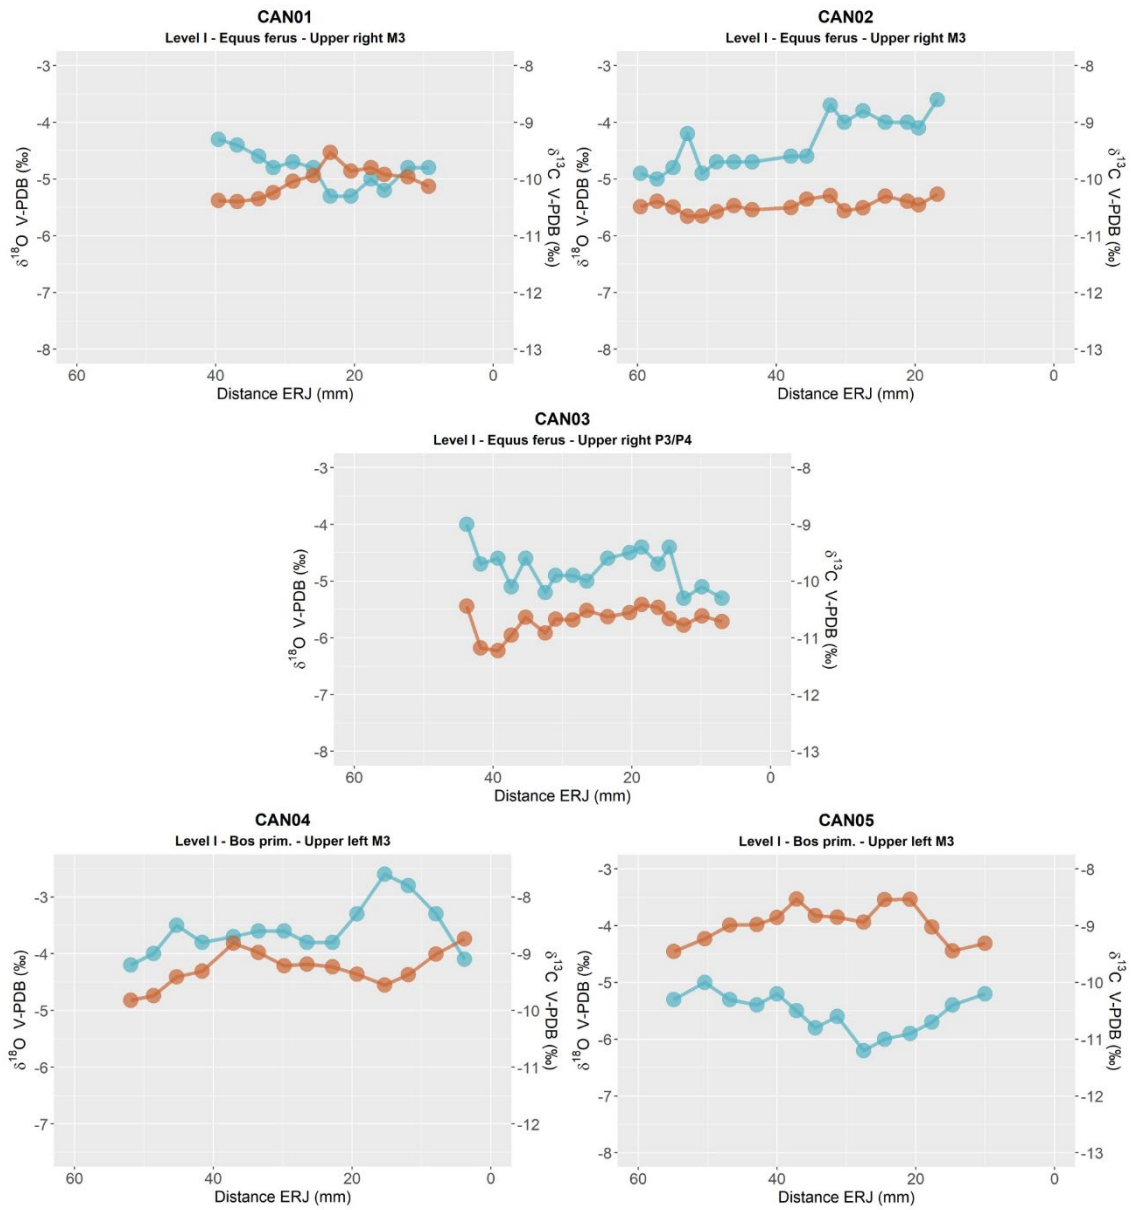

**Figure S4.9.** Intra-tooth plots of oxygen ( $\delta^{18}\text{O}$ ) and carbon ( $\delta^{13}\text{C}$ ) isotope composition from teeth from Canyars considering the sample's distance from the enamel root junction (ERC).

## Section 5 – Inverse Modelling: Methodological Details and Models

The intra-tooth  $\delta^{18}\text{O}$  profiles presented in this study were obtained through the application of inverse modelling, using an adapted version of the code published in reference (Passey et al., 2005b). This modeling approach allowed for the correction of the damping effect and the reconstruction of the original  $\delta^{18}\text{O}$  input time series. The model reproduces the temporal delay between  $\delta^{18}\text{O}$  changes in the animal's input and their manifestation in tooth enamel, exhibiting a consistent x-direction delay in the modelled  $\delta^{18}\text{O}$  curve relative to the enamel  $\delta^{18}\text{O}$  input time series. The model utilizes different species-specific parameters related to enamel formation, which vary between bovines and equids. These parameters have been established based on previous studies (Bendrey et al., 2015; Zazzo et al., 2012; Passey and Cerling, 2002; Kohn, 2004; Blumenthal et al., 2014). For *Bos/Bison* sp., the initial mineral content of enamel is fixed at 25%, the enamel appositional length is set at 1.5 mm, and the maturation length is 25 mm. For *Equus* sp., the initial mineral content of enamel is fixed at 22%, the enamel appositional length is set at 6 mm, and the maturation length is 28 mm.

In addition, the model requires other variables related to sampling geometry, as well as error estimates derived from mass spectrometer measurements. The distance between samples varies for each tooth, but as a general trend, the sampling depth on the tooth enamel surface in the samples of this study represents approximately 70% of the total enamel depth. The standard deviation of the measurements obtained from the mass spectrometer was typically set at 0.12%, taking into account the uncertainty associated with the standards. Finally, the models require a damping factor that determines the cumulative damping along the isotopic profile by adjusting the measured error (E<sub>meas</sub>) to the prediction error (E<sub>pred</sub>). In the teeth analysed in this study, the damping factor ranged from 0.001 to 0.1.

The most likely model solutions were selected, and summer and winter values were extracted from the  $\delta^{18}\text{O}$  profiles, considering the original peaks and troughs identified in the unmodelled  $\delta^{18}\text{O}$  profile. This approach was adopted to prevent the introduction of artificial peaks that the model may produce, particularly in teeth without a distinct sinusoidal shape. Flat and less sinusoidal profile are less suitable for the application of the model, given its inherent assumption of an approximately sinusoidal form. Non-sinusoidal curves can lead to complex interpretations in the model outcomes. Consequently, this methodology was not applied to analysed intra-tooth  $\delta^{13}\text{C}$  profiles, as the examined individuals did not exhibit appreciable seasonal change.

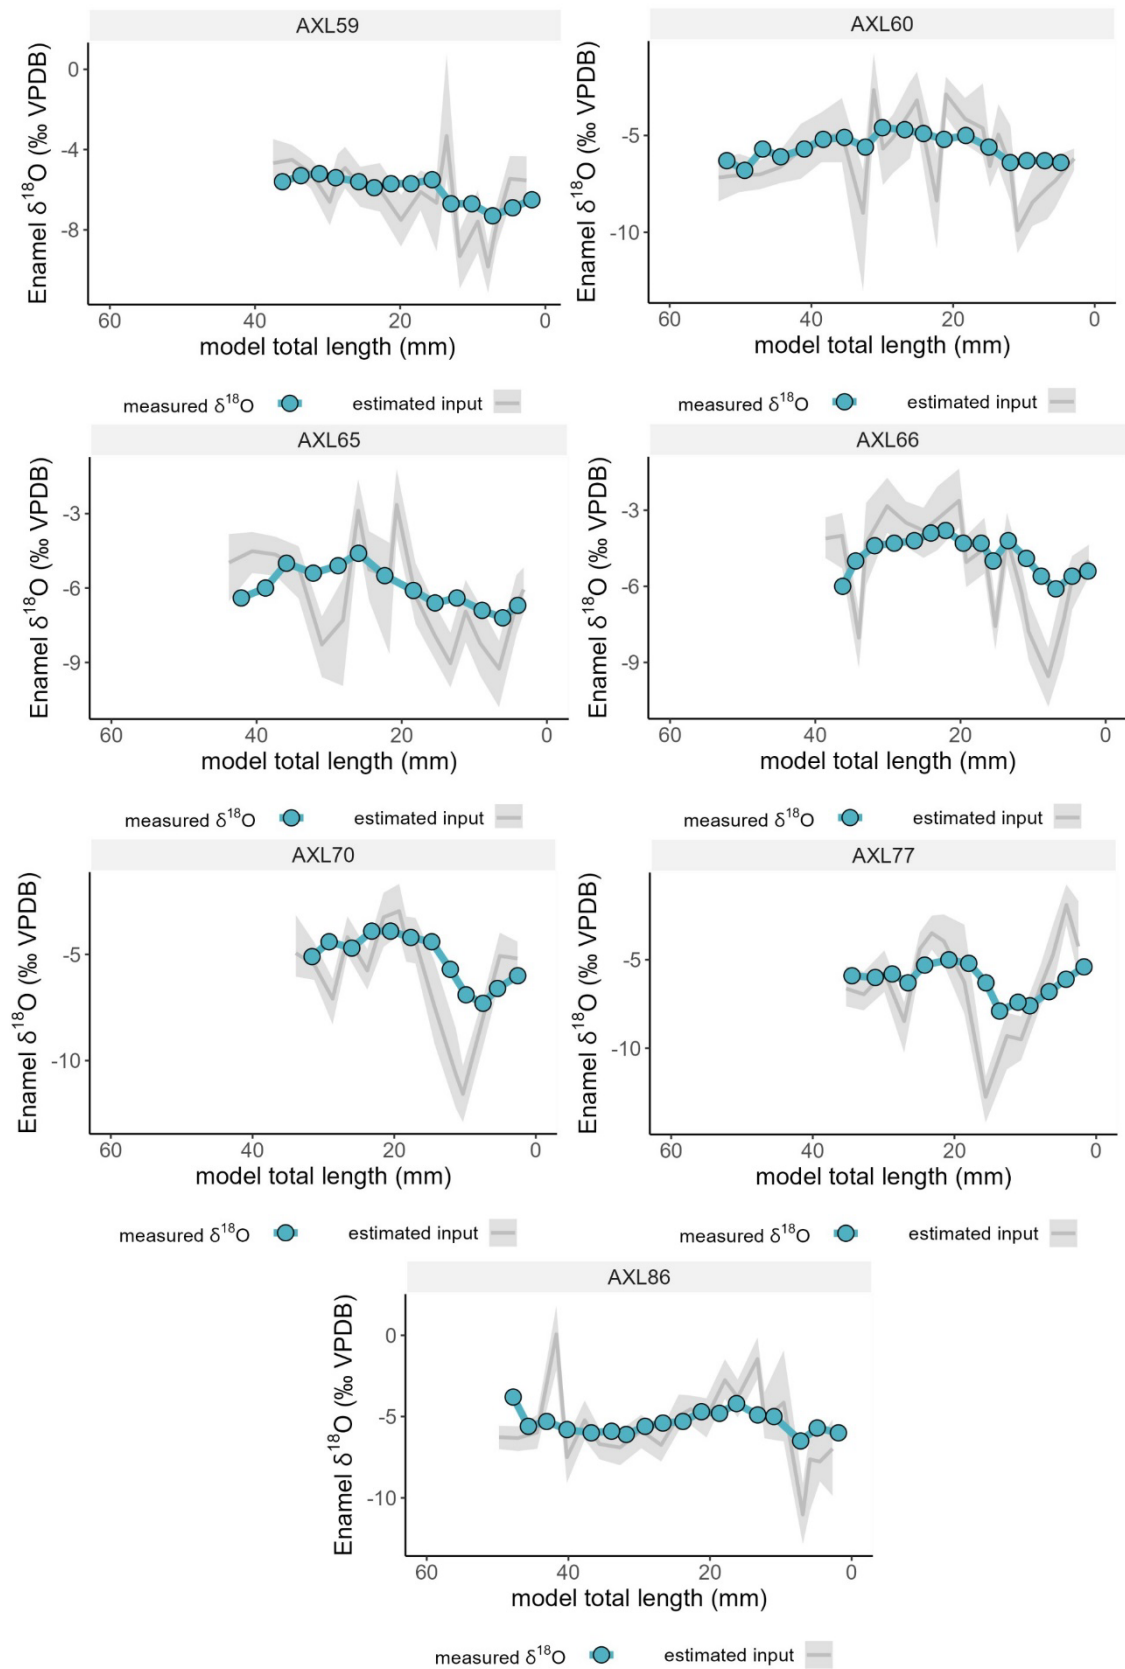

**Figure S5.1.** Inverse models for oxygen isotope composition ( $\delta^{18}\text{O}$ ) from teeth from Axlors, considering distance from enamel root junction. The blue line and points correspond to original data and grey line the most likely model solution, with the 95% confidence interval shown in shaded areas.



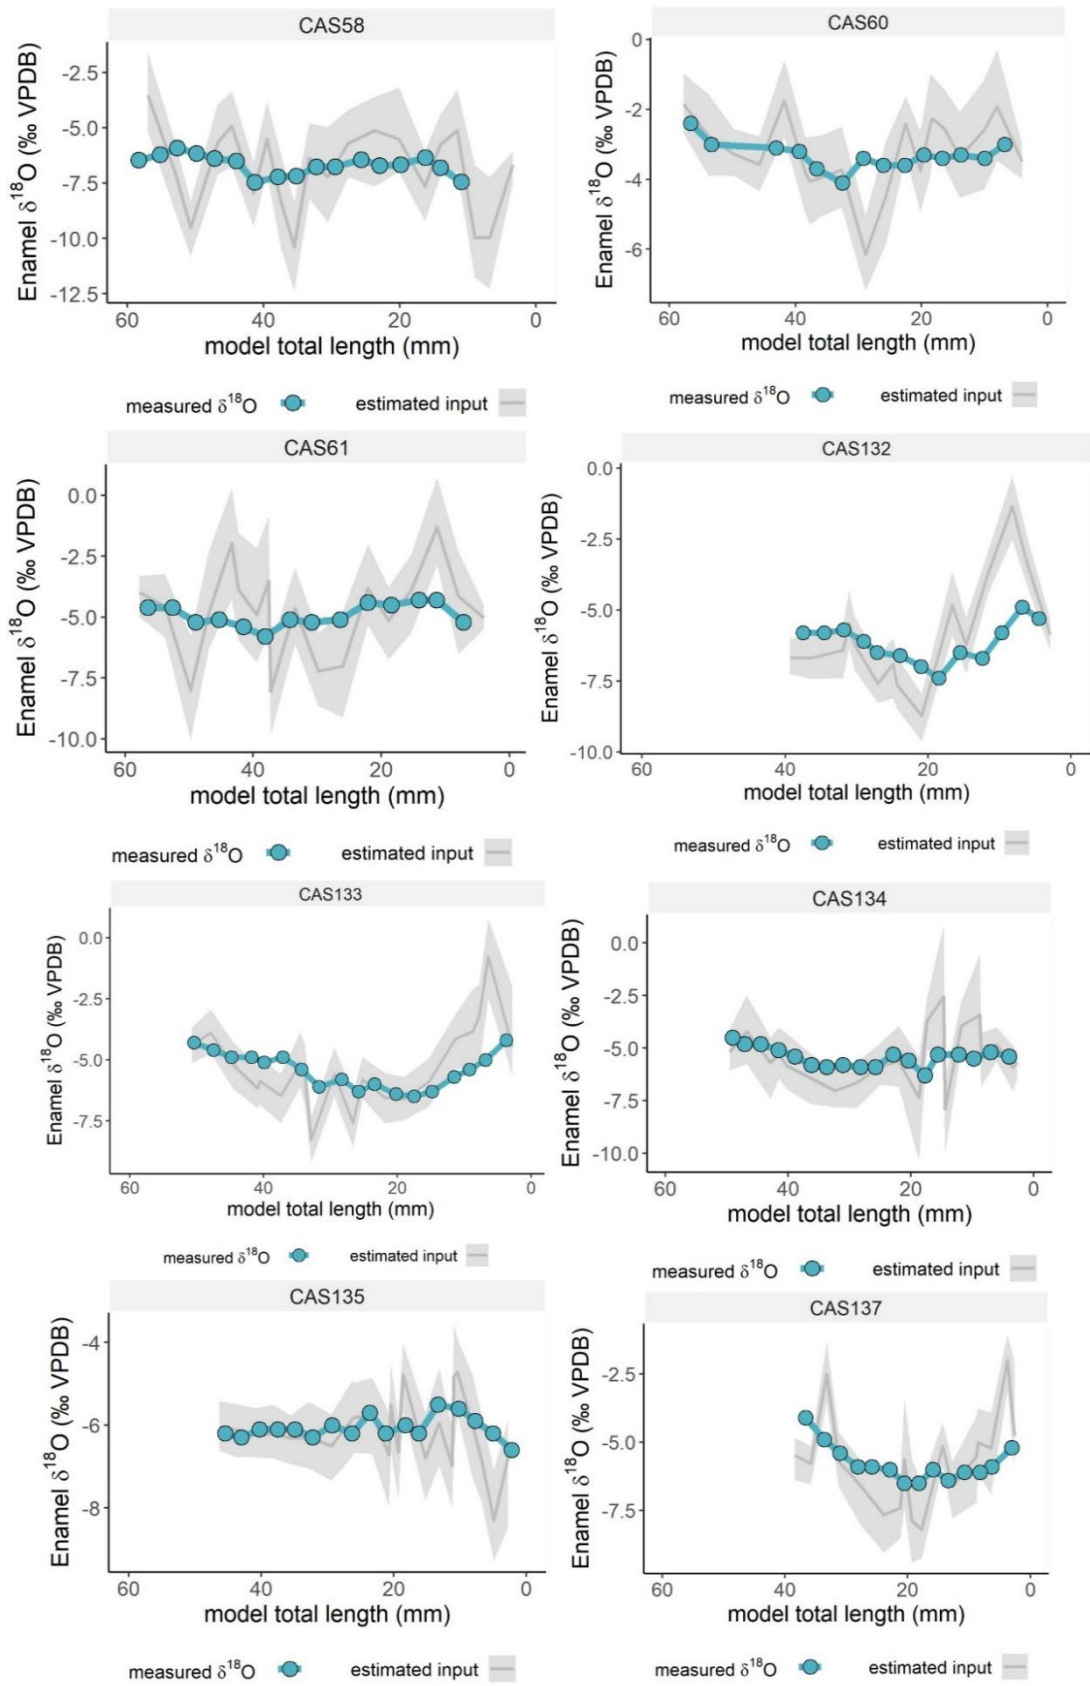

**Figure S5.2.** Inverse models for oxygen isotope composition ( $\delta^{18}\text{O}$ ) from teeth from El Castillo, considering distance from enamel root junction. The blue line and points correspond to original data and grey line the most likely model solution, with the 95% confidence interval shown in shaded areas.

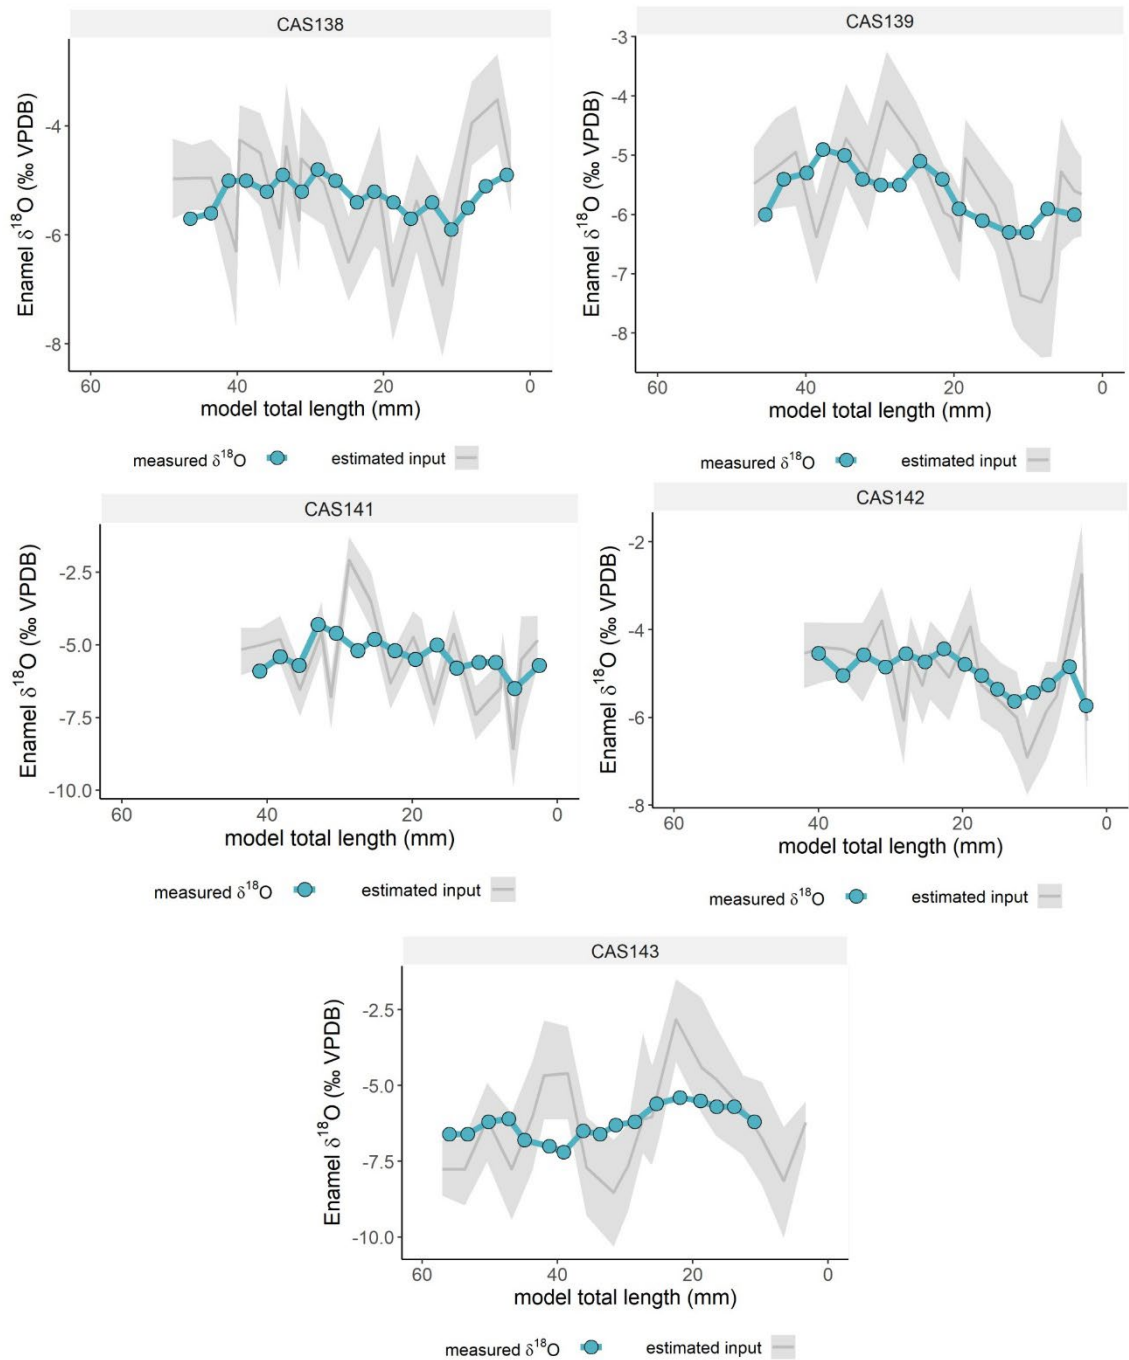

**Figure S5.3.** Inverse models for oxygen isotope composition ( $\delta^{18}\text{O}$ ) from teeth from El Castillo, considering distance from enamel root junction. The blue line and points correspond to the original data and the grey line is the most likely model solution, with the 95% confidence interval shown in shaded areas.

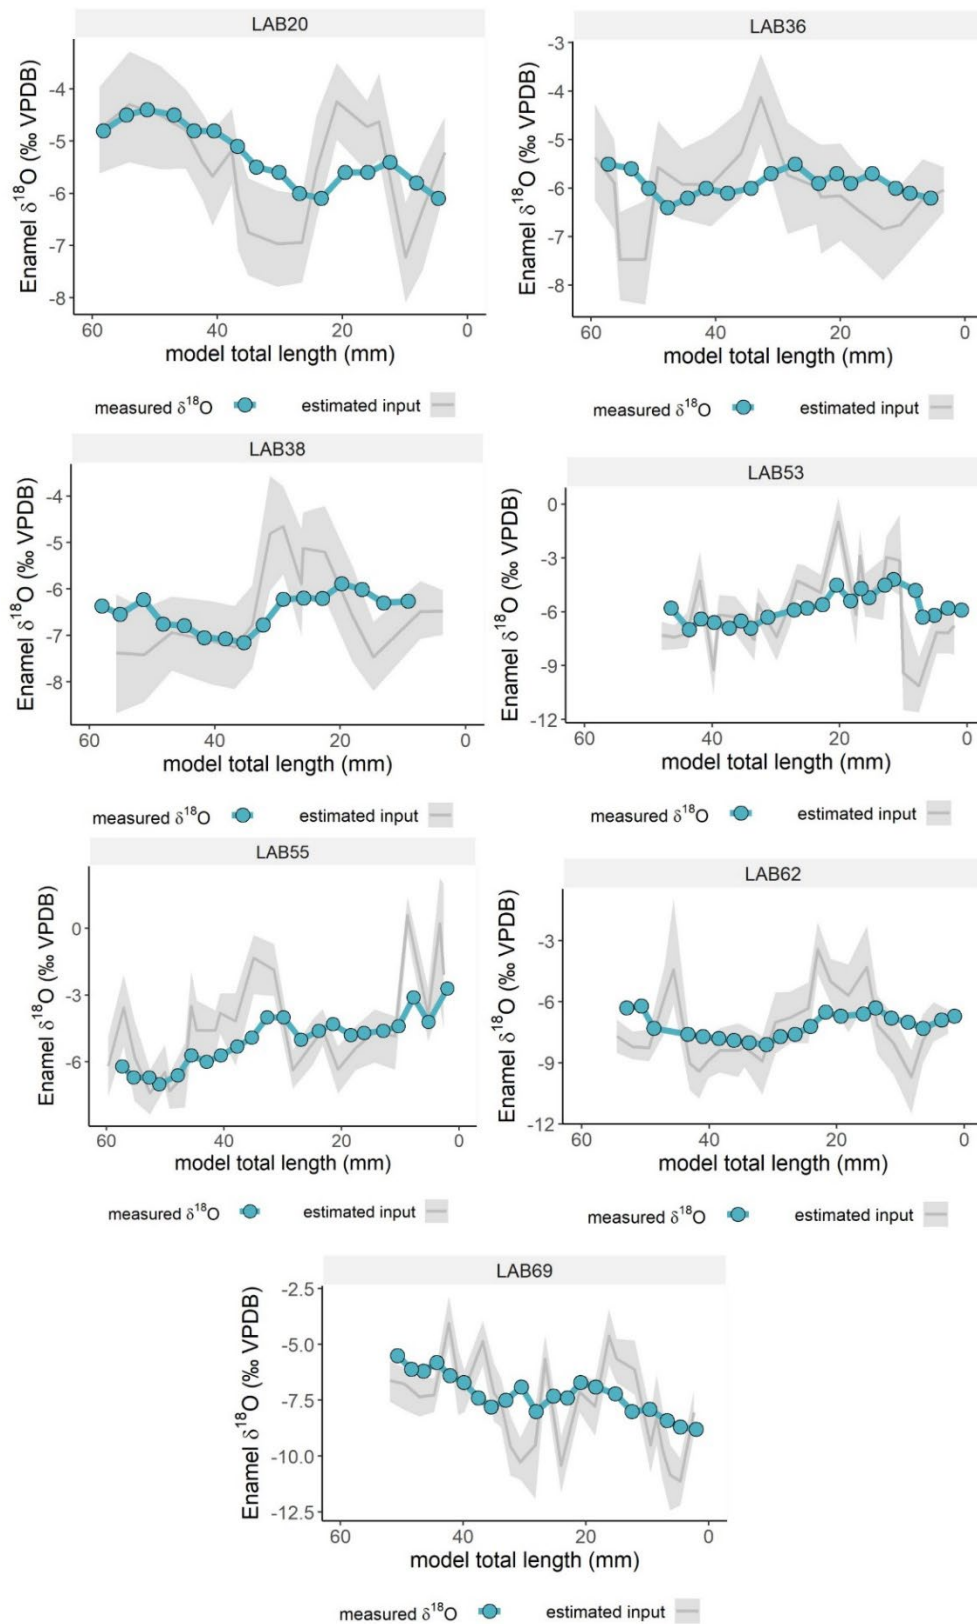

**Figure S5.4.** Inverse models for oxygen isotope composition ( $\delta^{18}\text{O}$ ) from teeth from Labeko Koba, considering distance from enamel root junction. The blue line and points correspond to the original data, and the grey line is the most likely model solution, with the 95% confidence interval shown in shaded areas.

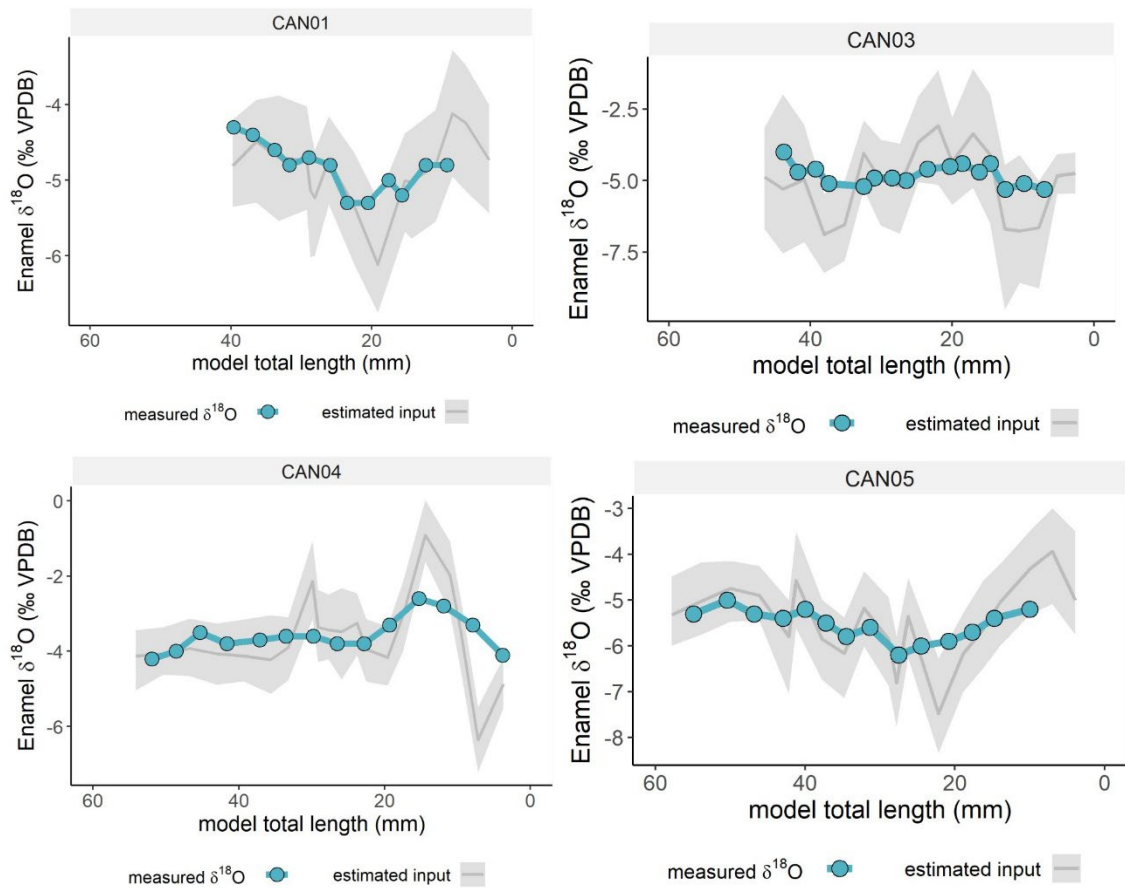

**Figure S5.5.** Inverse models for oxygen isotope composition ( $\delta^{18}\text{O}$ ) from teeth from Canyars considering distance from enamel root junction. The blue line and points correspond to original data and grey line the most likely model solution, with the 95% confidence interval shown in shaded areas.

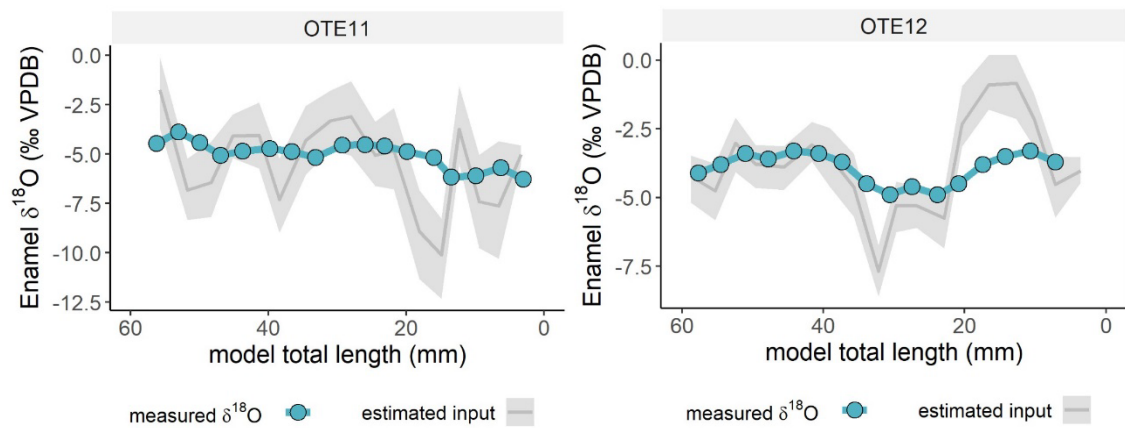

**Figure S5.6.** Inverse models for oxygen isotope composition ( $\delta^{18}\text{O}$ ) from teeth from El Otero, considering distance from enamel root junction. The blue line and points correspond to original data and the grey line is the most likely model solution, with the 95% confidence interval shown in shaded areas.

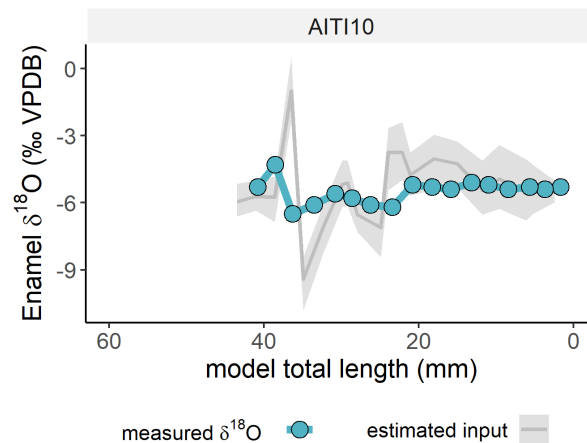

**Figure S5.7.** Inverse models for oxygen isotope composition ( $\delta^{18}\text{O}$ ) from teeth from Aitzbitarte III interior, considering distance from enamel root junction. The blue line and points correspond to the original data, and the grey line is the most likely model solution, with the 95% confidence interval shown in shaded areas.

## References Section 5

- Bendrey, R., Vella, D., Zazzo, A., Balasse, M., and Lepetz, S.: Exponentially decreasing tooth growth rate in horse teeth: implications for isotopic analyses, *Archaeometry*, 57, 1104–1124, <https://doi.org/10.1111/arc.12151>, 2015.
- Blumenthal, S. A., Cerling, T. E., Chritz, K. L., Bromage, T. G., Kozdon, R., and Valley, J. W.: Stable isotope time-series in mammalian teeth: In situ  $\delta^{18}\text{O}$  from the innermost enamel layer, *Geochim. Cosmochim. Acta*, 124, 223–236, <https://doi.org/10.1016/j.gca.2013.09.032>, 2014.
- Kohn, M. J.: Comment: Tooth Enamel Mineralization in Ungulates: Implications for Recovering a Primary Isotopic Time-Series, by B. H. Passey and T. E. Cerling (2002), *Geochim. Cosmochim. Acta*, 68, 403–405, [https://doi.org/10.1016/S0016-7037\(03\)00443-5](https://doi.org/10.1016/S0016-7037(03)00443-5), 2004.
- Passey, B. H. and Cerling, T. E.: Tooth enamel mineralization in ungulates: implications for recovering a primary isotopic time-series, *Geochim. Cosmochim. Acta*, 66, 3225–3234, [https://doi.org/10.1016/S0016-7037\(02\)00933-X](https://doi.org/10.1016/S0016-7037(02)00933-X), 2002.
- Passey, B. H., Robinson, T. F., Ayliffe, L. K., Cerling, T. E., Sponheimer, M., Dearing, M. D., Roeder, B. L., and Ehleringer, J. R.: Carbon isotope fractionation between diet, breath  $\text{CO}_2$ , and bioapatite in different mammals, *J. Archaeol. Sci.*, 32, 1459–1470, <https://doi.org/10.1016/j.jas.2005.03.015>, 2005.
- Zazzo, A., Bendrey, R., Vella, D., Moloney, A. P., Monahan, F. J., and Schmidt, O.: A refined sampling strategy for intra-tooth stable isotope analysis of mammalian enamel, *Geochim. Cosmochim. Acta*, 84, 1–13, <https://doi.org/10.1016/j.gca.2012.01.012>, 2012.
